# Supplementary material for: Enantioselective synthesis of tricyclic amino acid derivatives based on a rigid 4-azatricyclo[5.2.1.02,6]decane skeleton
Source: publisher site journal article supplement (doi:10.3762/bjoc.5.81), 2009-12-21

## **Supporting Information File 2:**

### **NMR spectra of all new compounds**

#### **Enantioselective synthesis of tricyclic amino acid derivatives based on a rigid 4-azatricyclo[5.2.1.0<sup>2,6</sup>]decane skeleton**

Matthias Breuning<sup>\*,1</sup>, Tobias Häuser<sup>1</sup>, Christian Mehler<sup>1</sup>, Christian Däschlein<sup>2</sup>,  
Carsten Strohmann<sup>2</sup>, Andreas Oechsner<sup>3</sup> and Holger Braunschweig<sup>3</sup>

Address: <sup>1</sup>Institut für Organische Chemie, Universität Würzburg, Am Hubland,  
97074 Würzburg, Germany, <sup>2</sup>Anorganische Chemie, Universität Dortmund, Otto-Hahn-Str. 6,  
44227 Dortmund, Germany and <sup>3</sup>Institut für Anorganische Chemie, Universität Würzburg,  
Am Hubland, 97074 Würzburg, Germany

Email: Matthias Breuning\* - [breuning@chemie.uni-wuerzburg.de](mailto:breuning@chemie.uni-wuerzburg.de)

\* Corresponding author

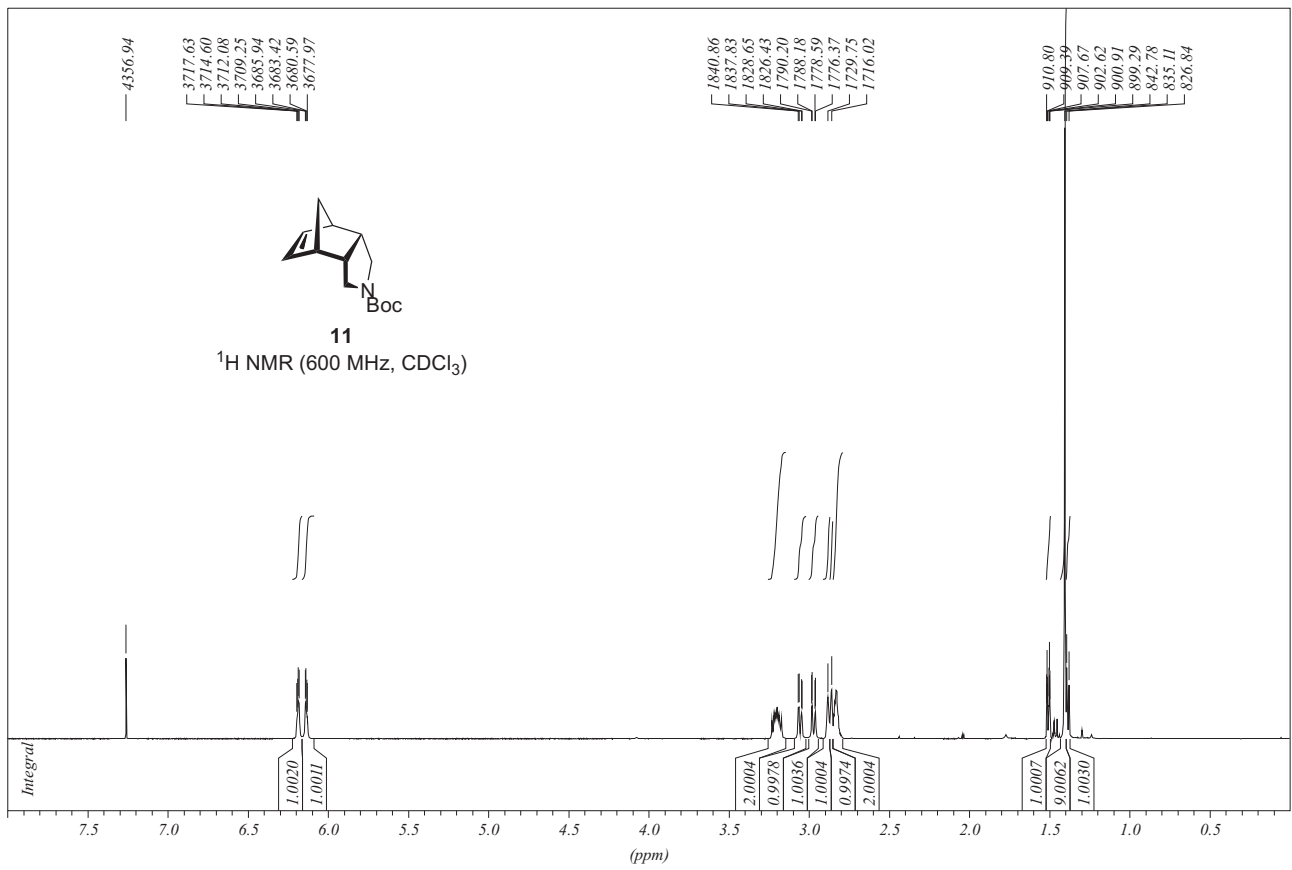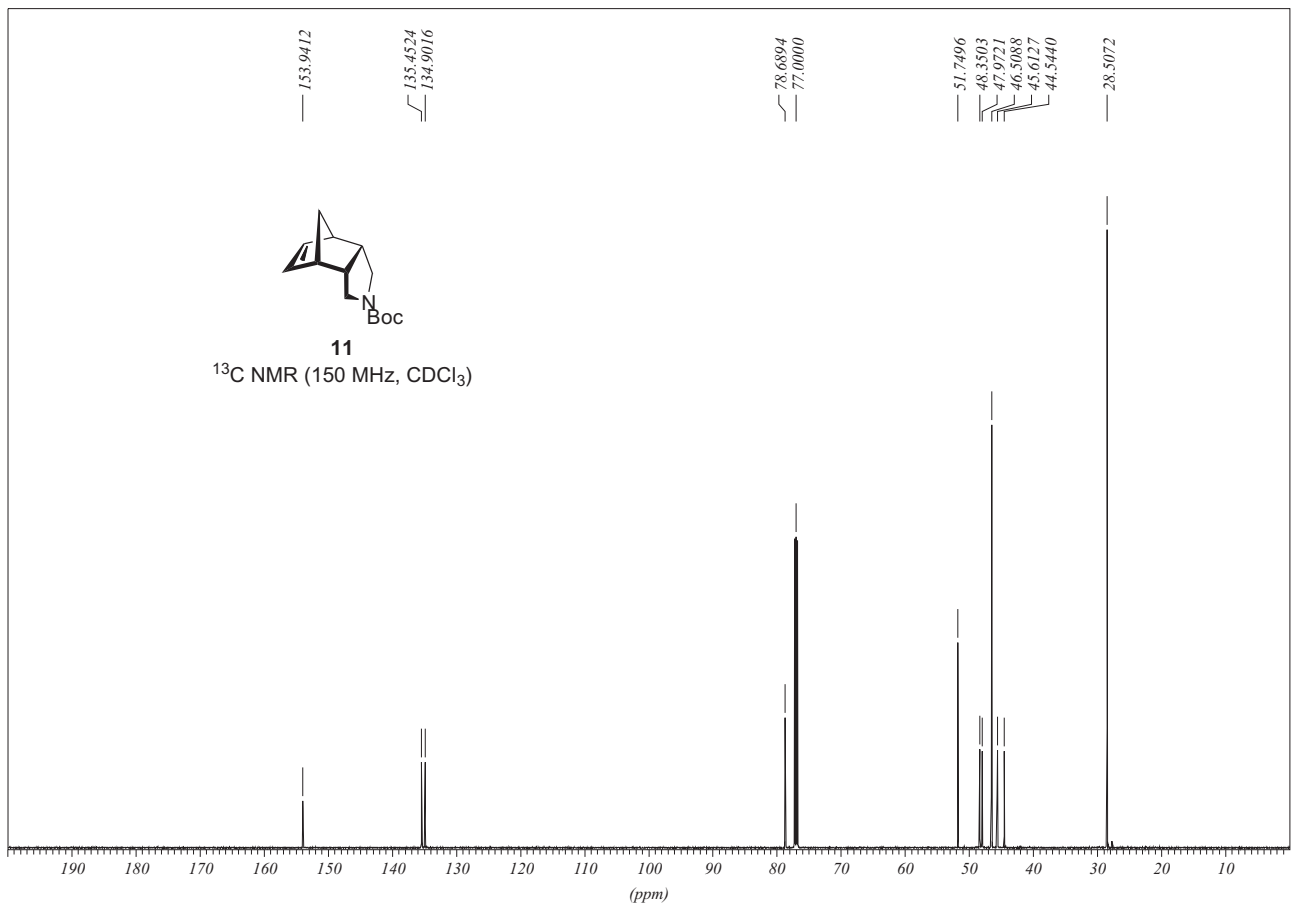

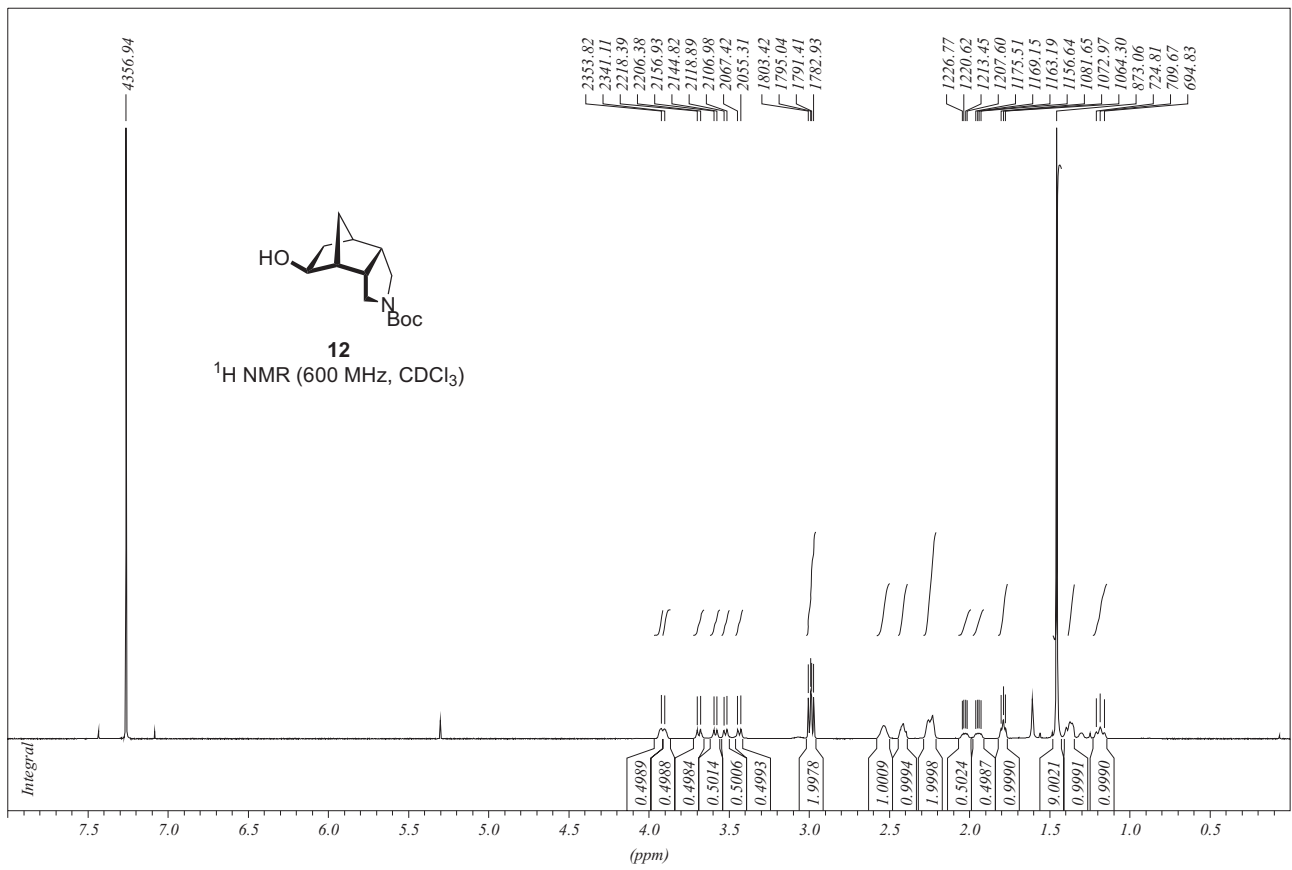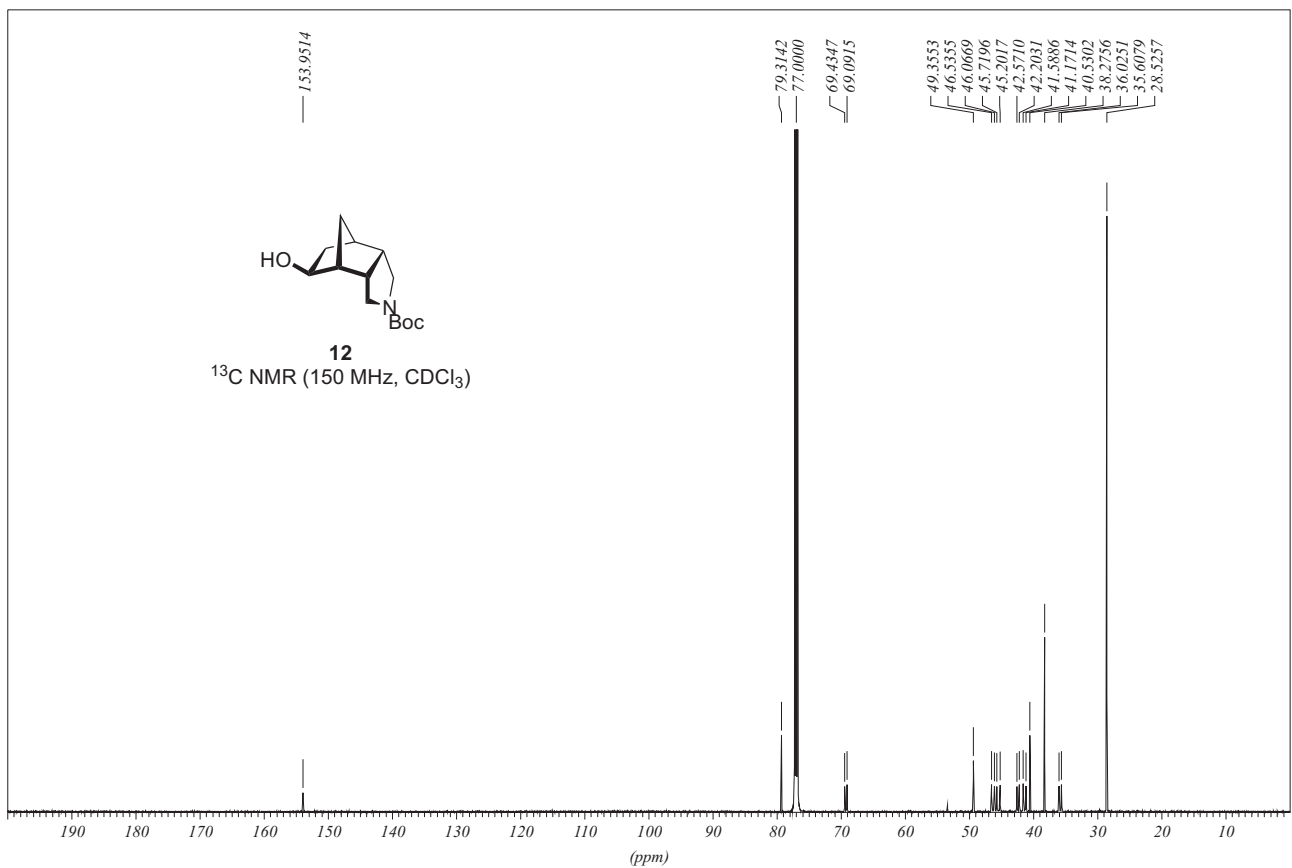

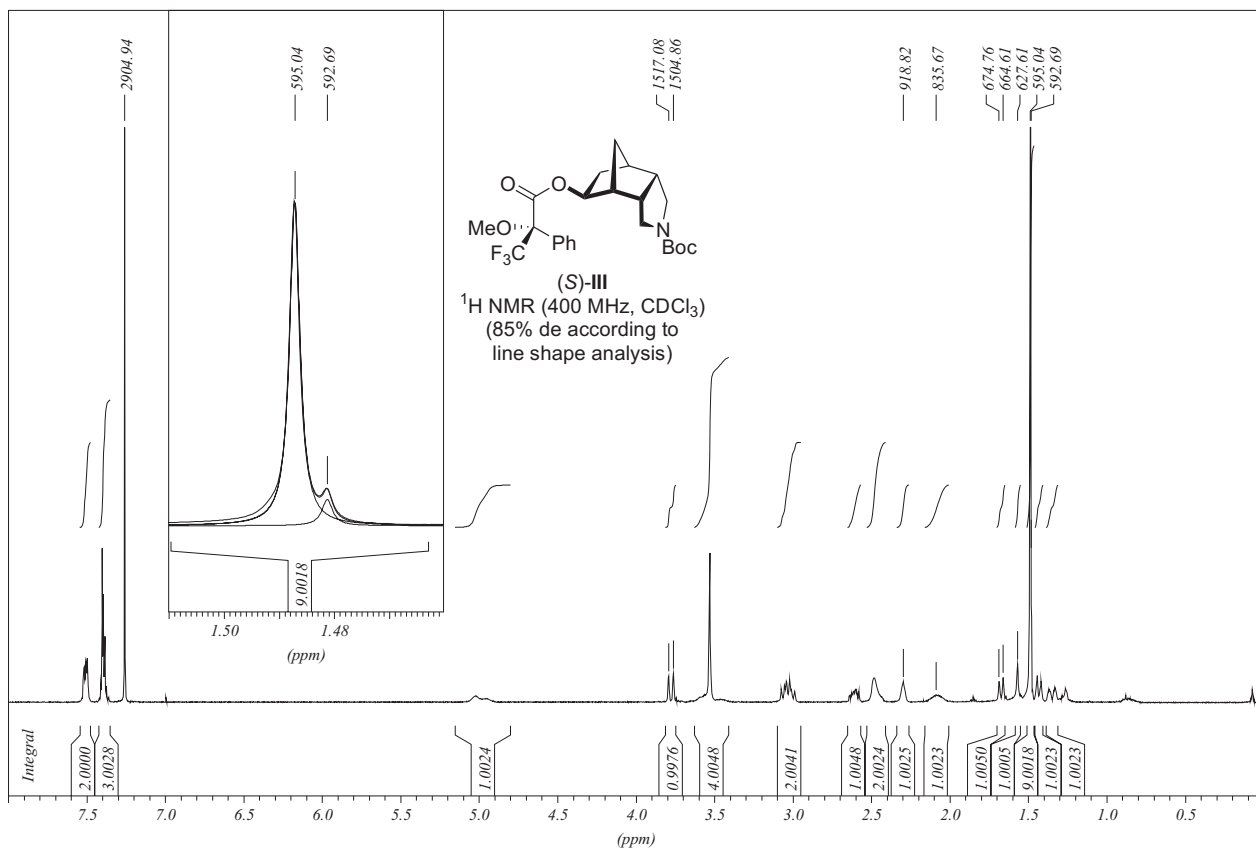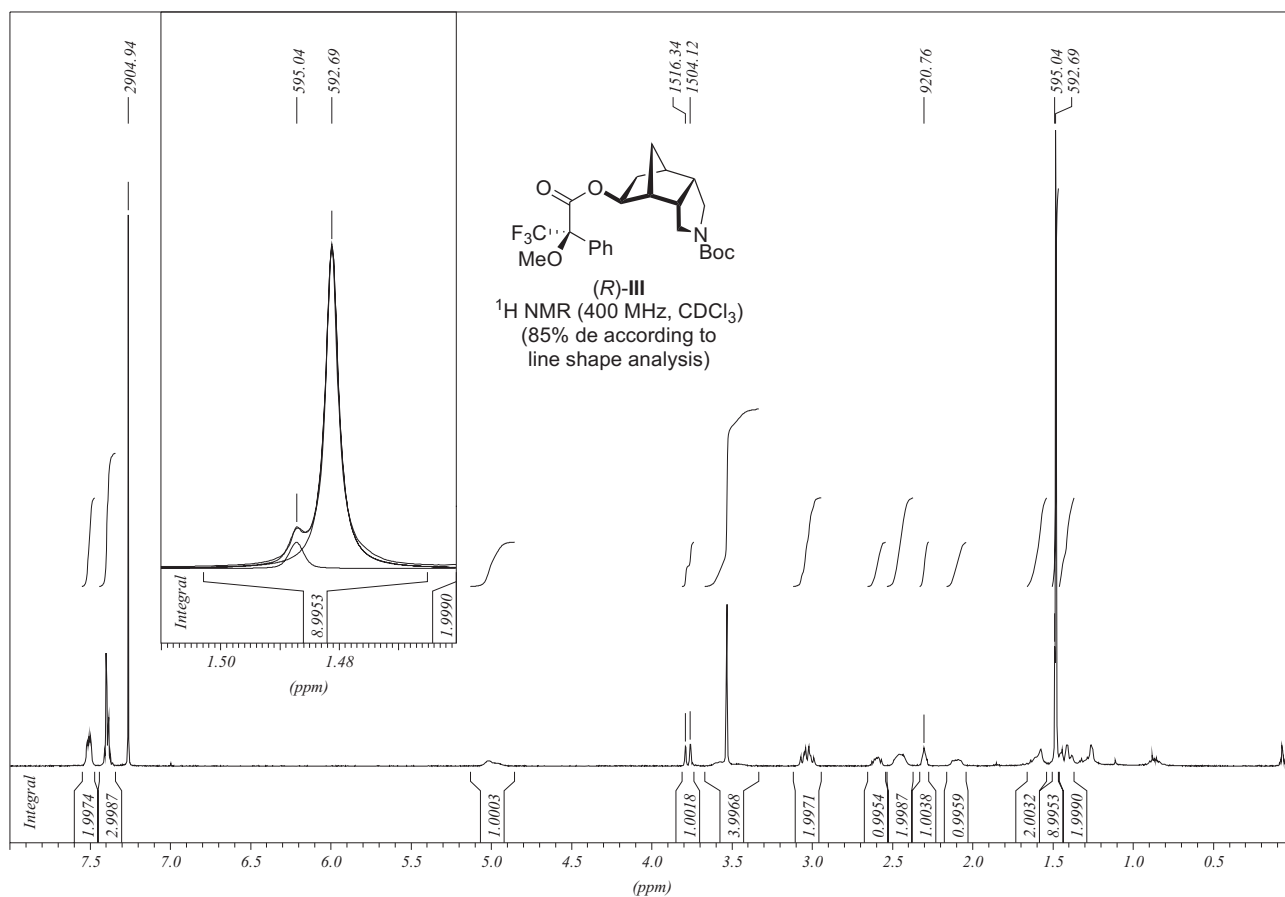

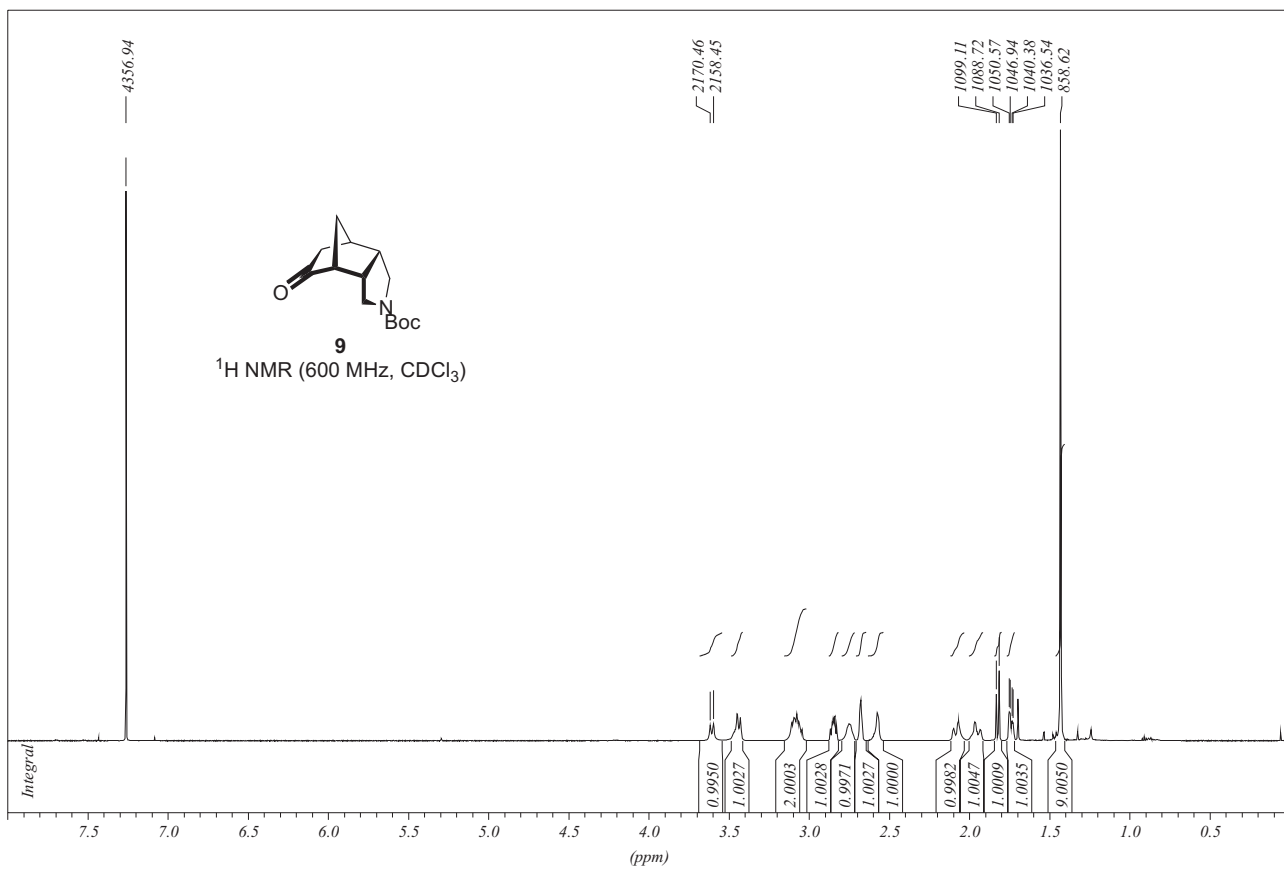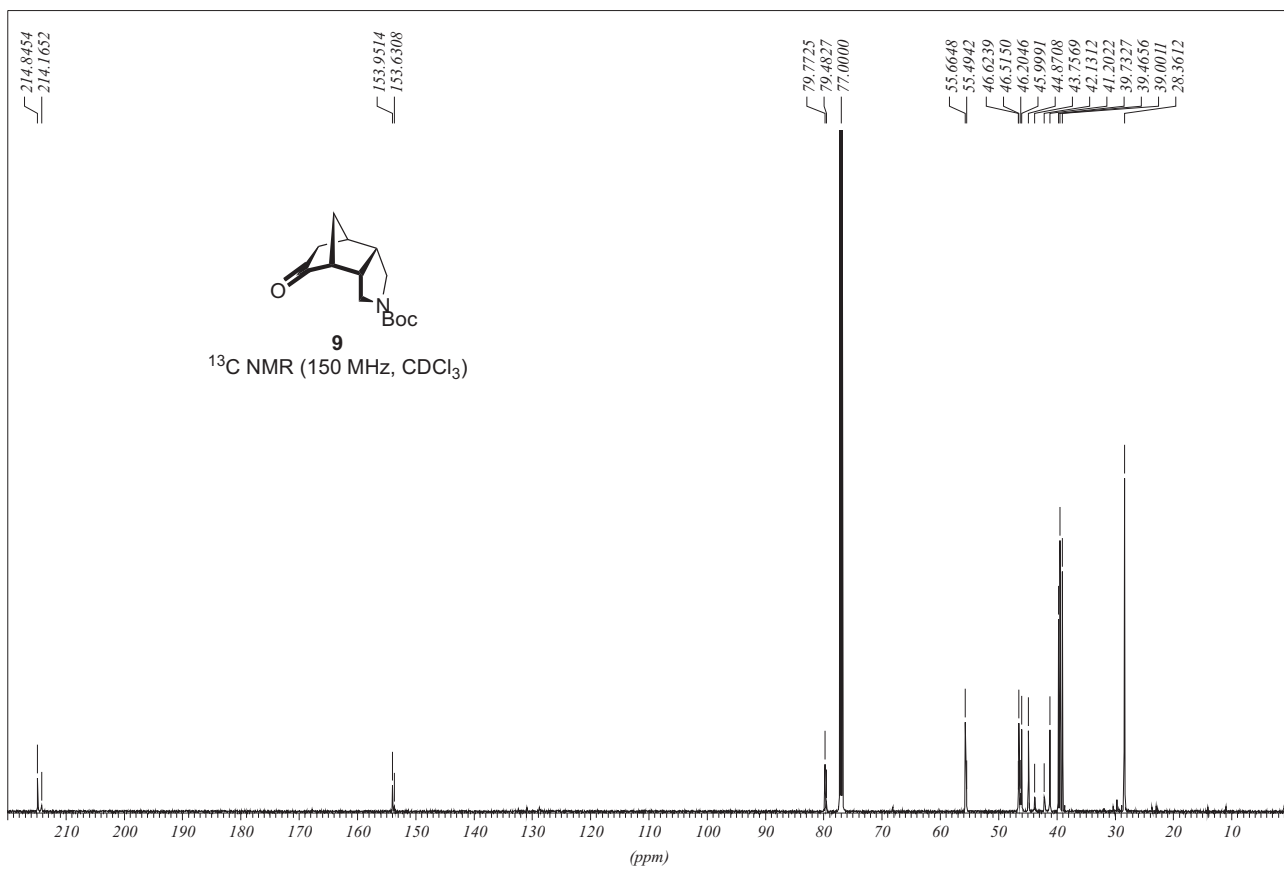

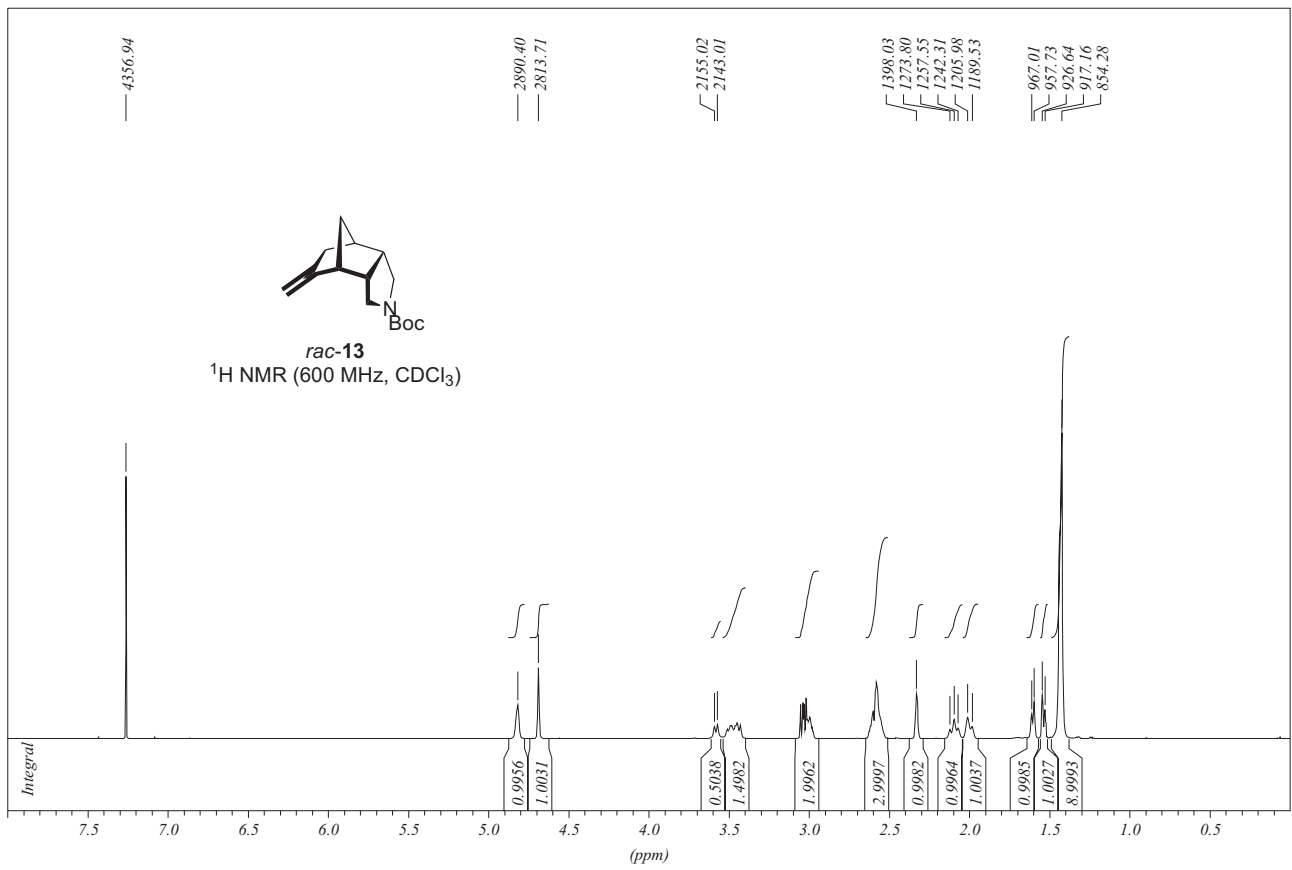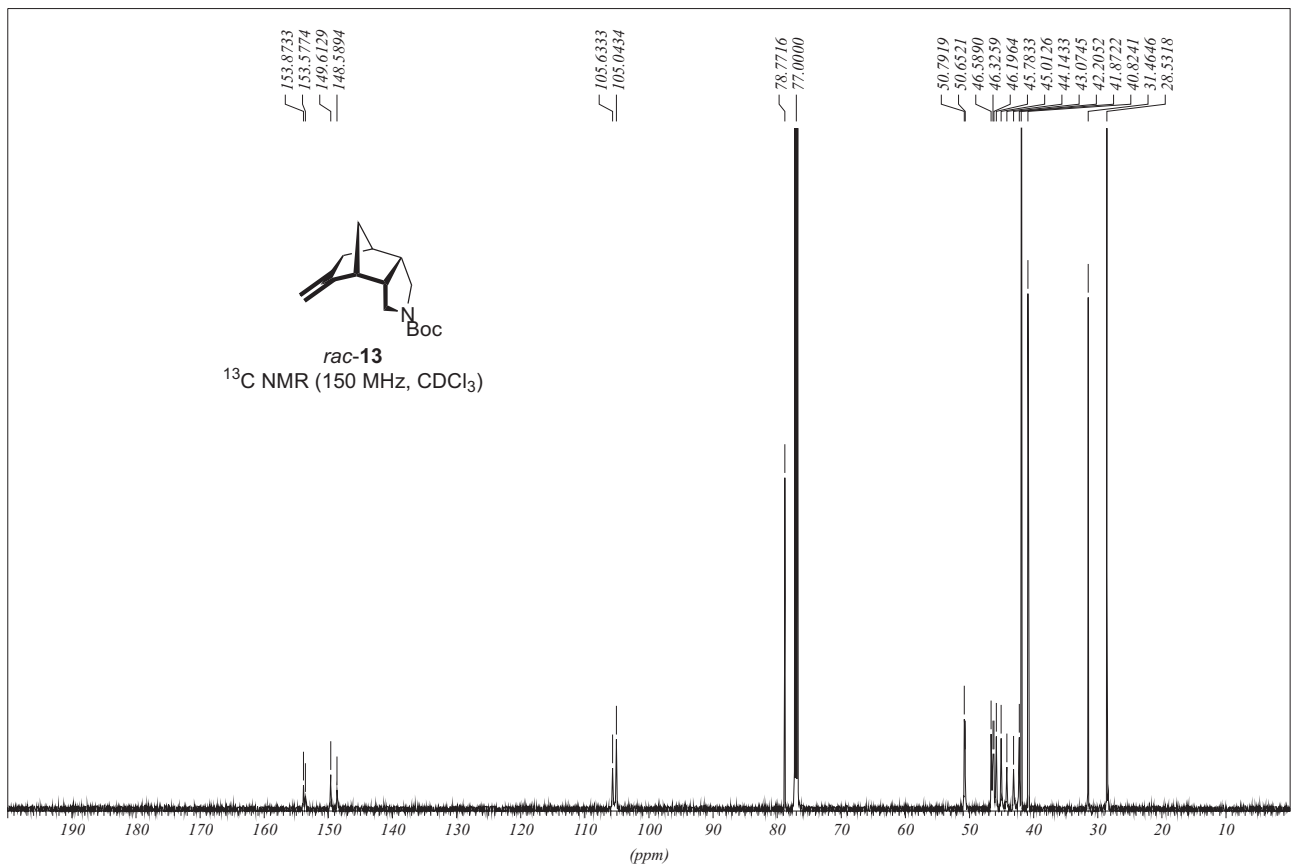

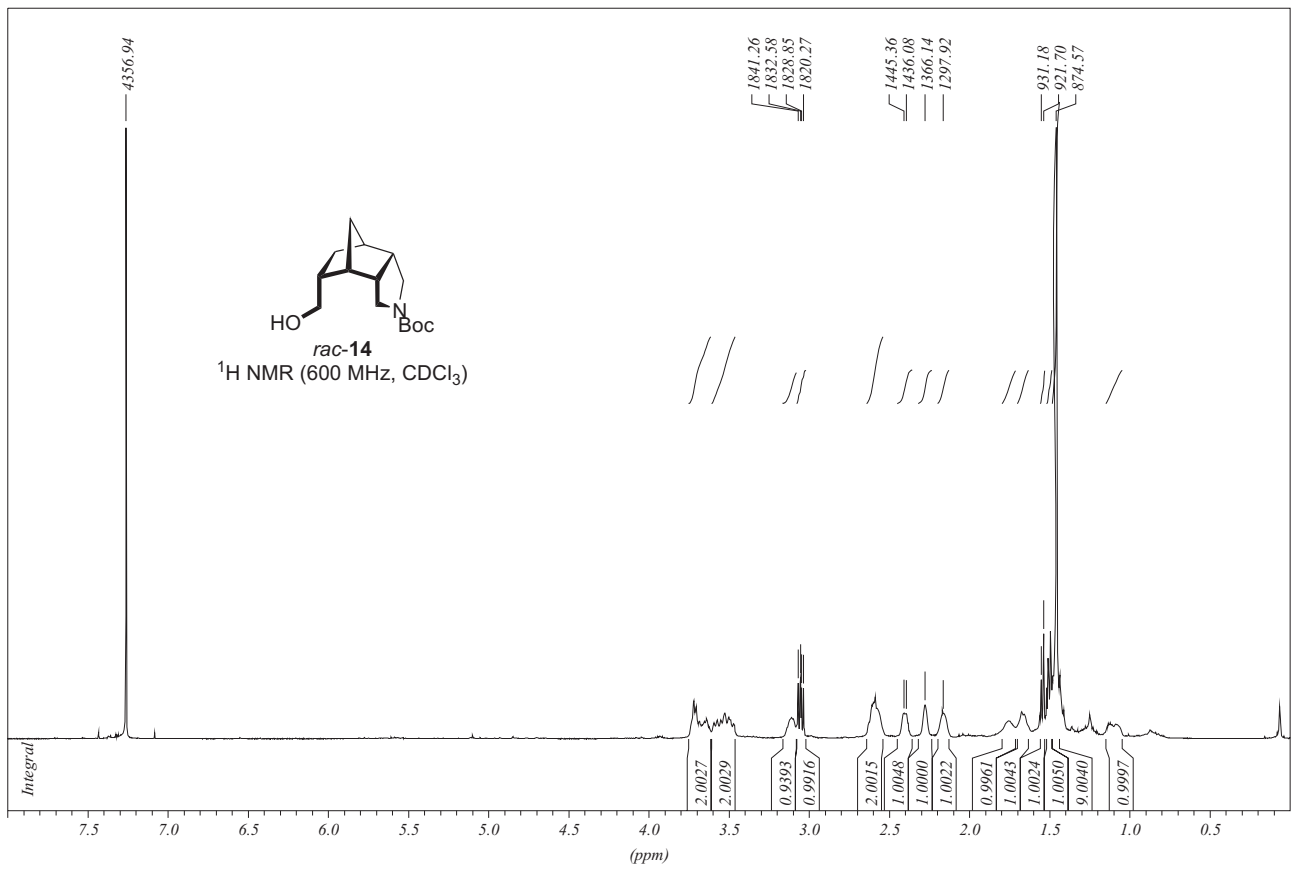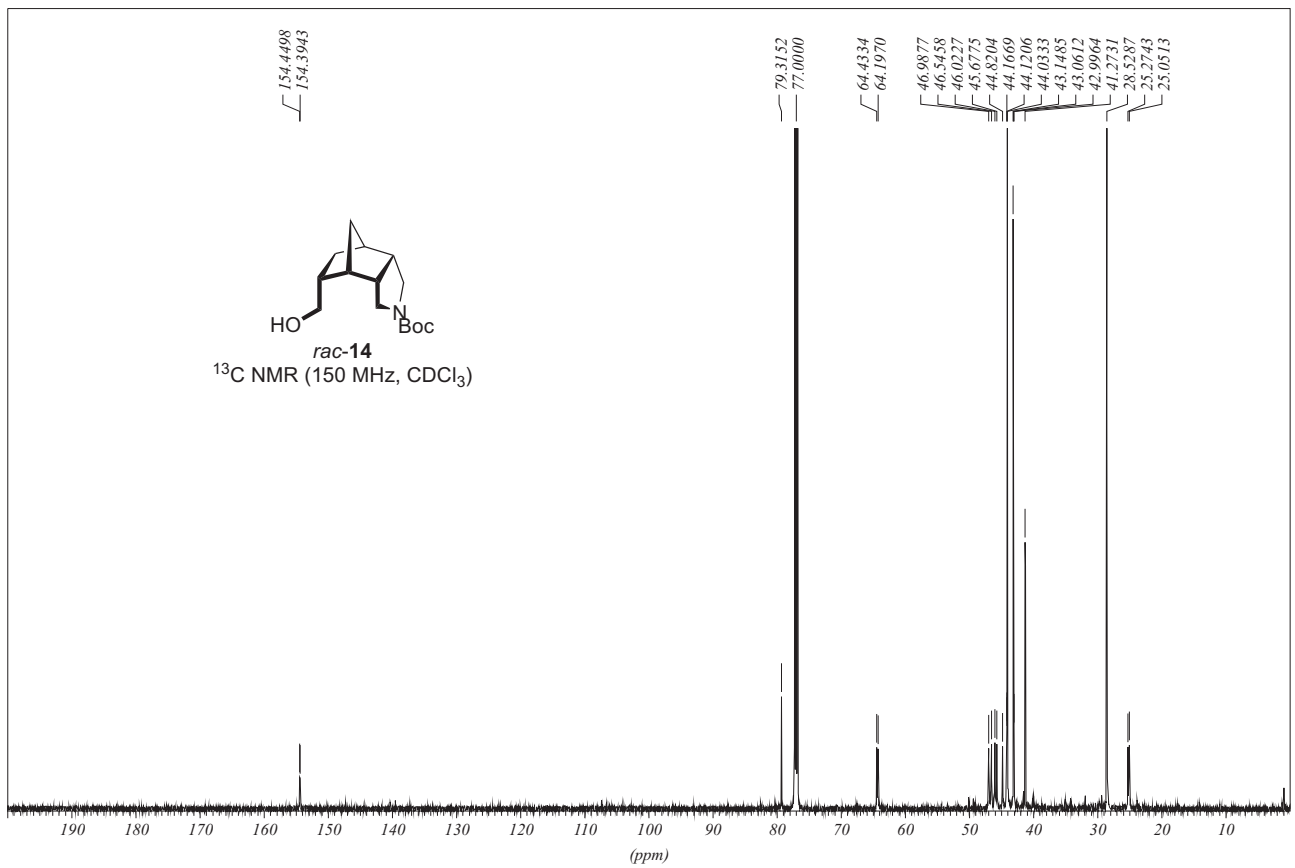

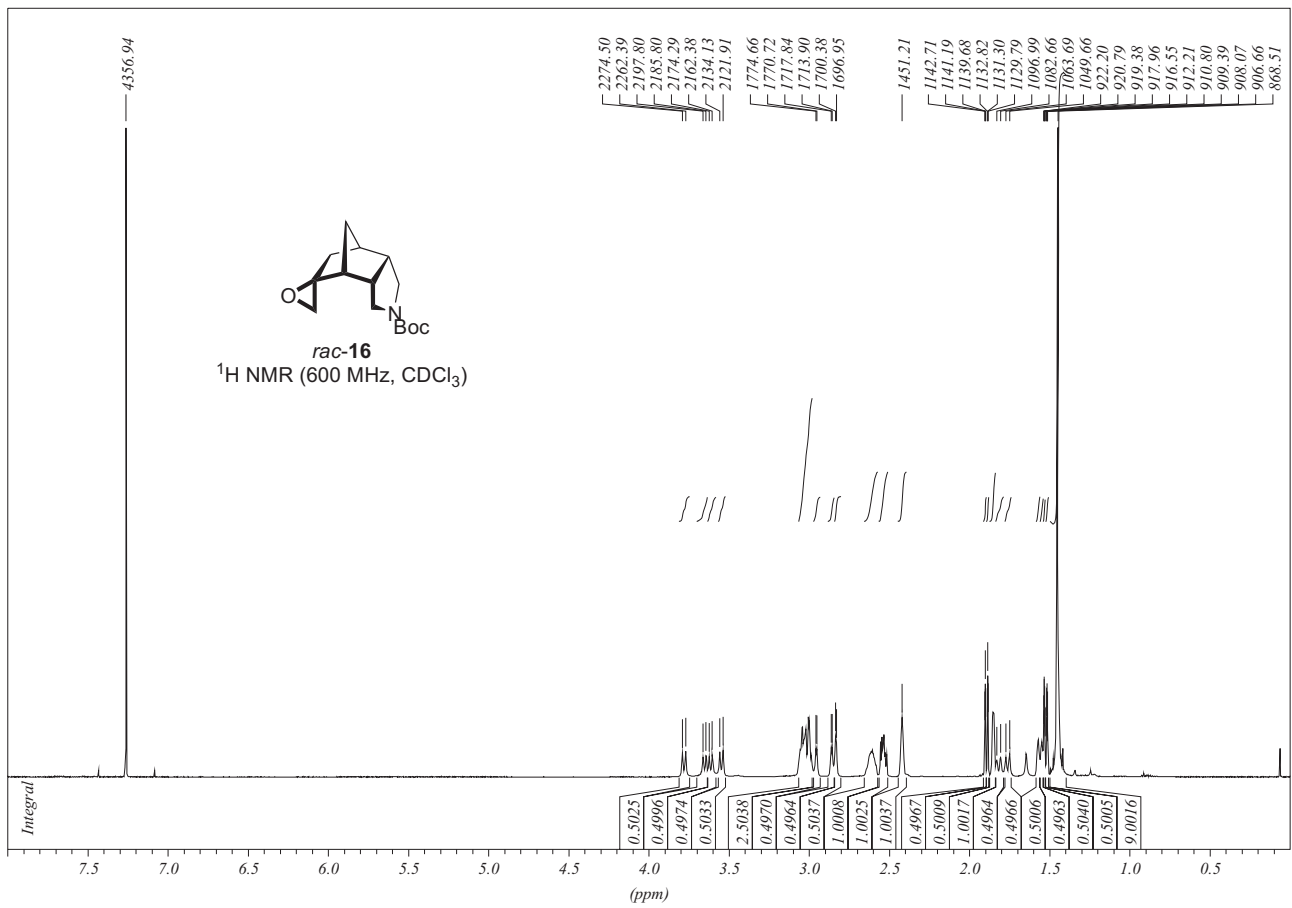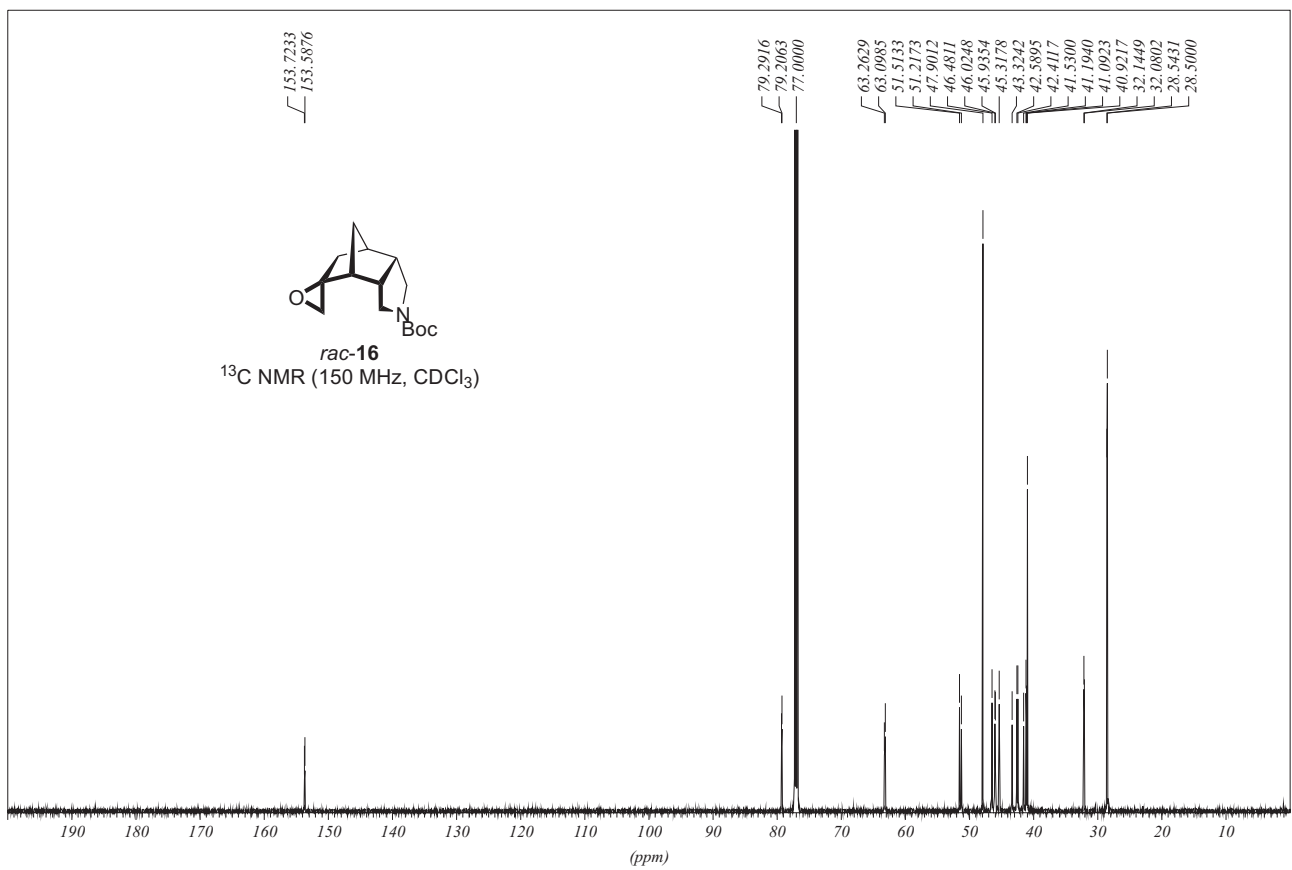



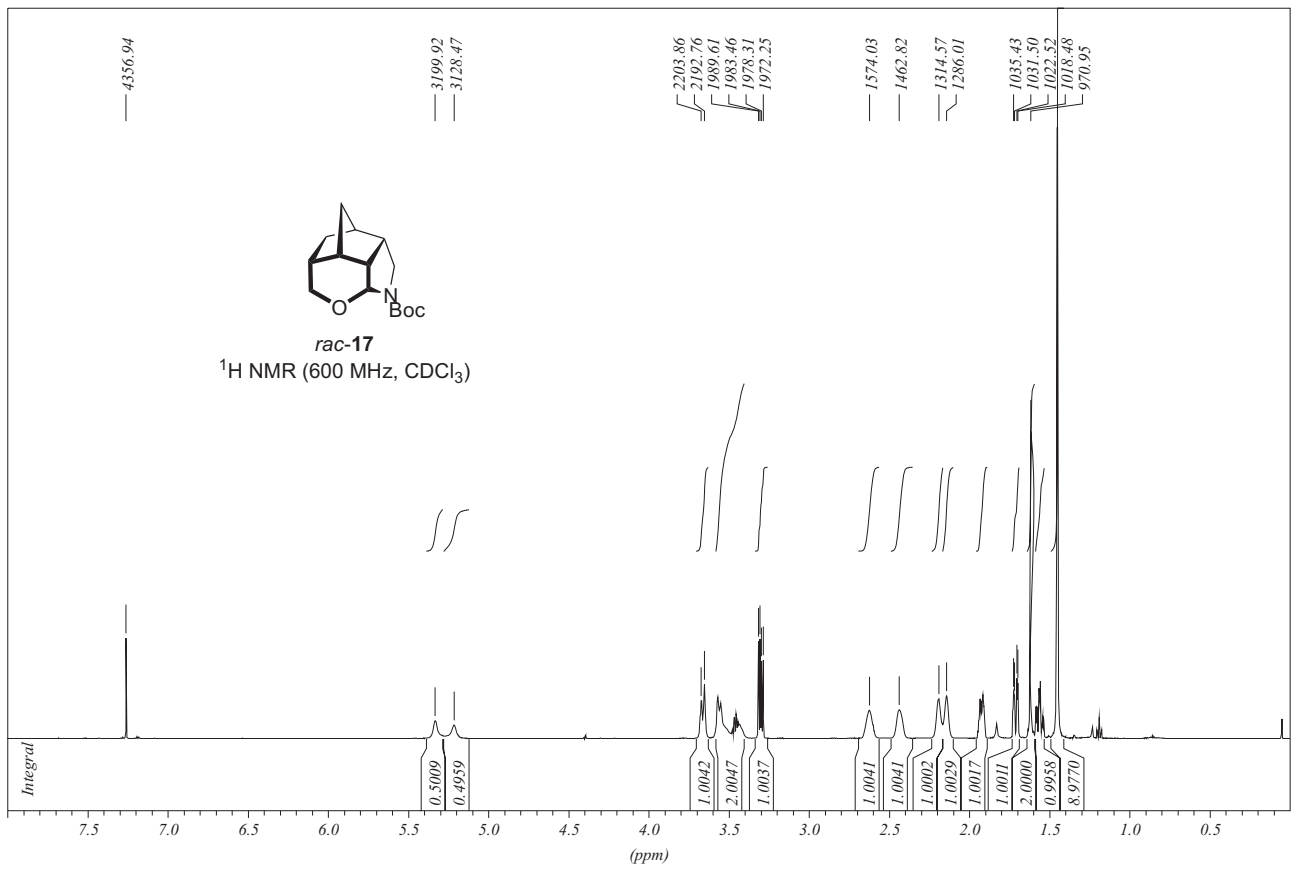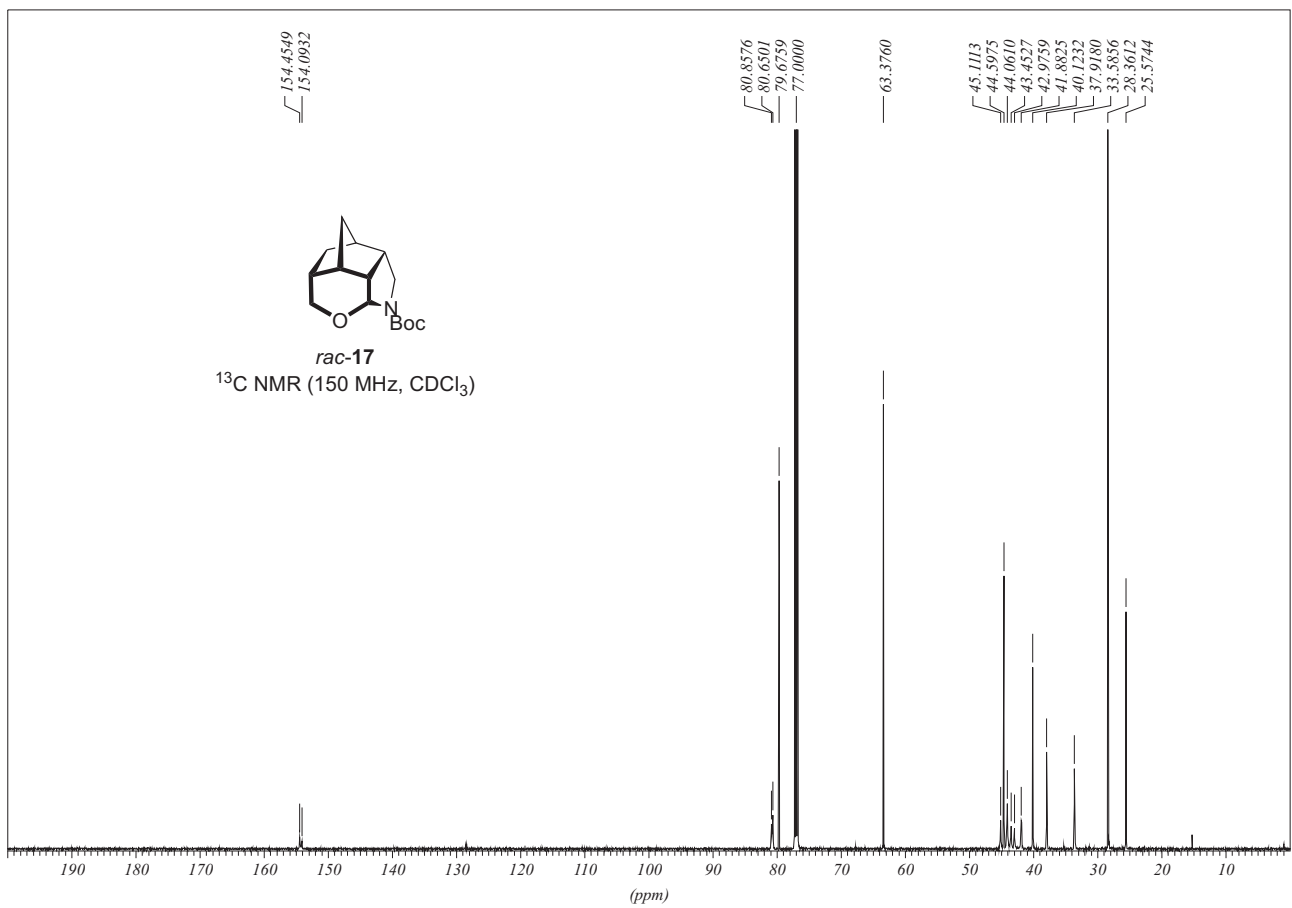

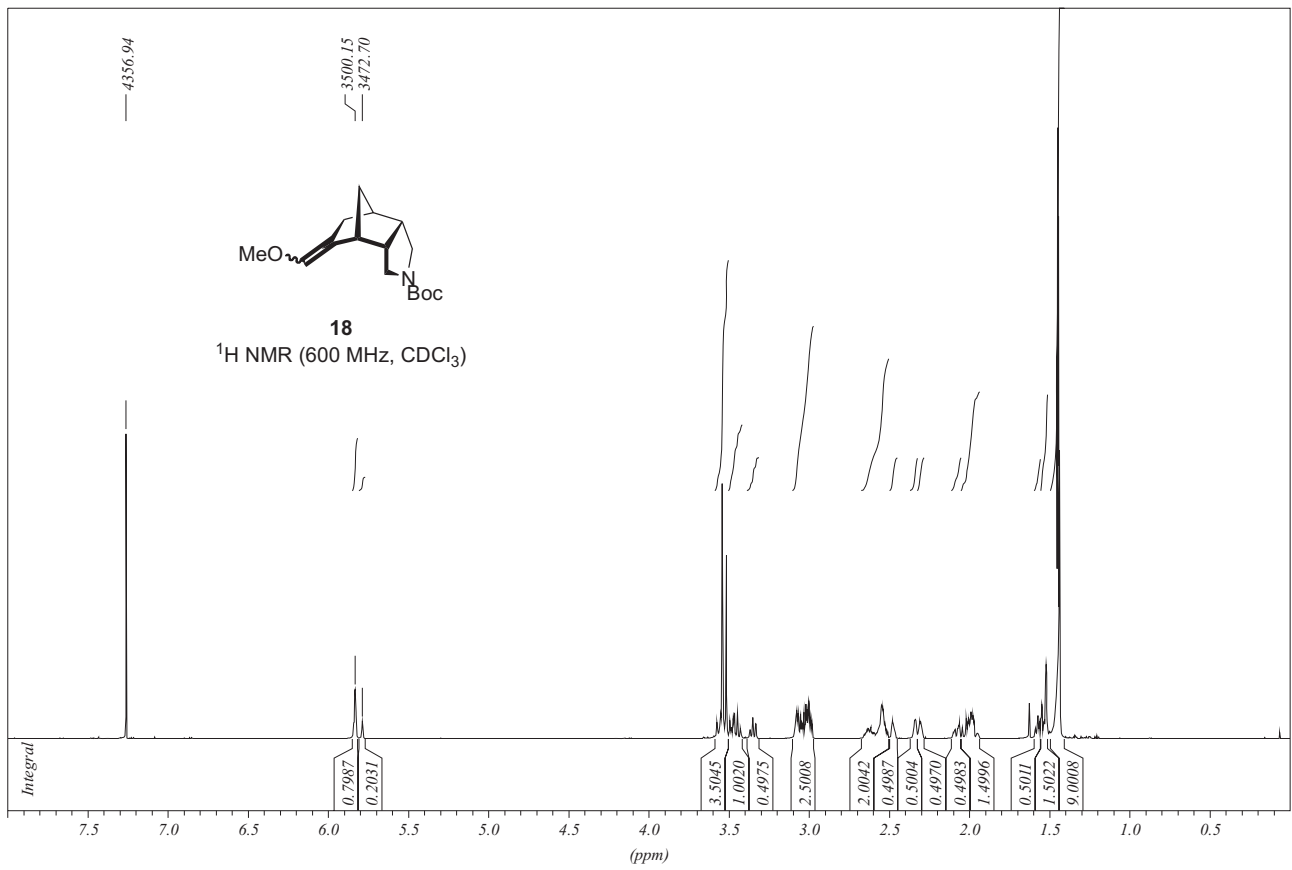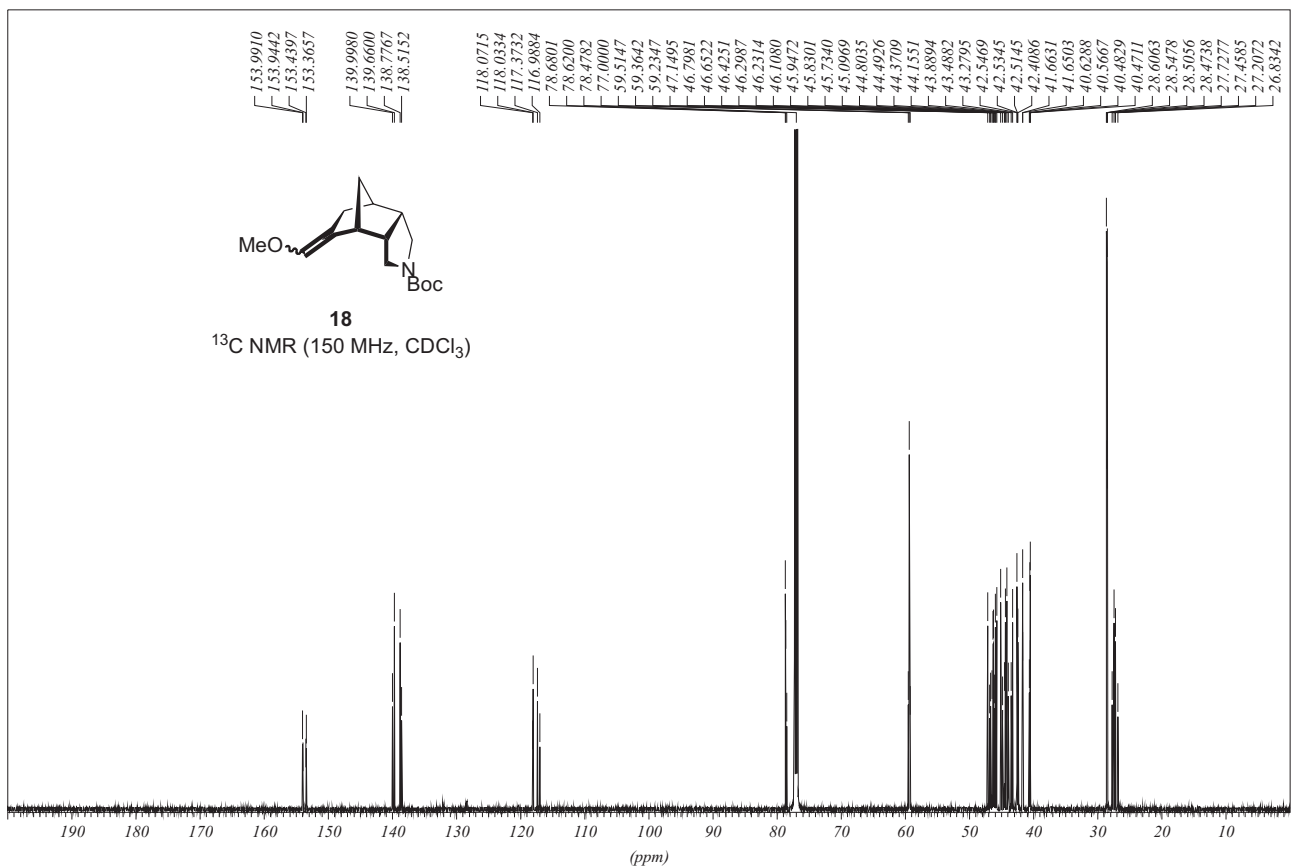

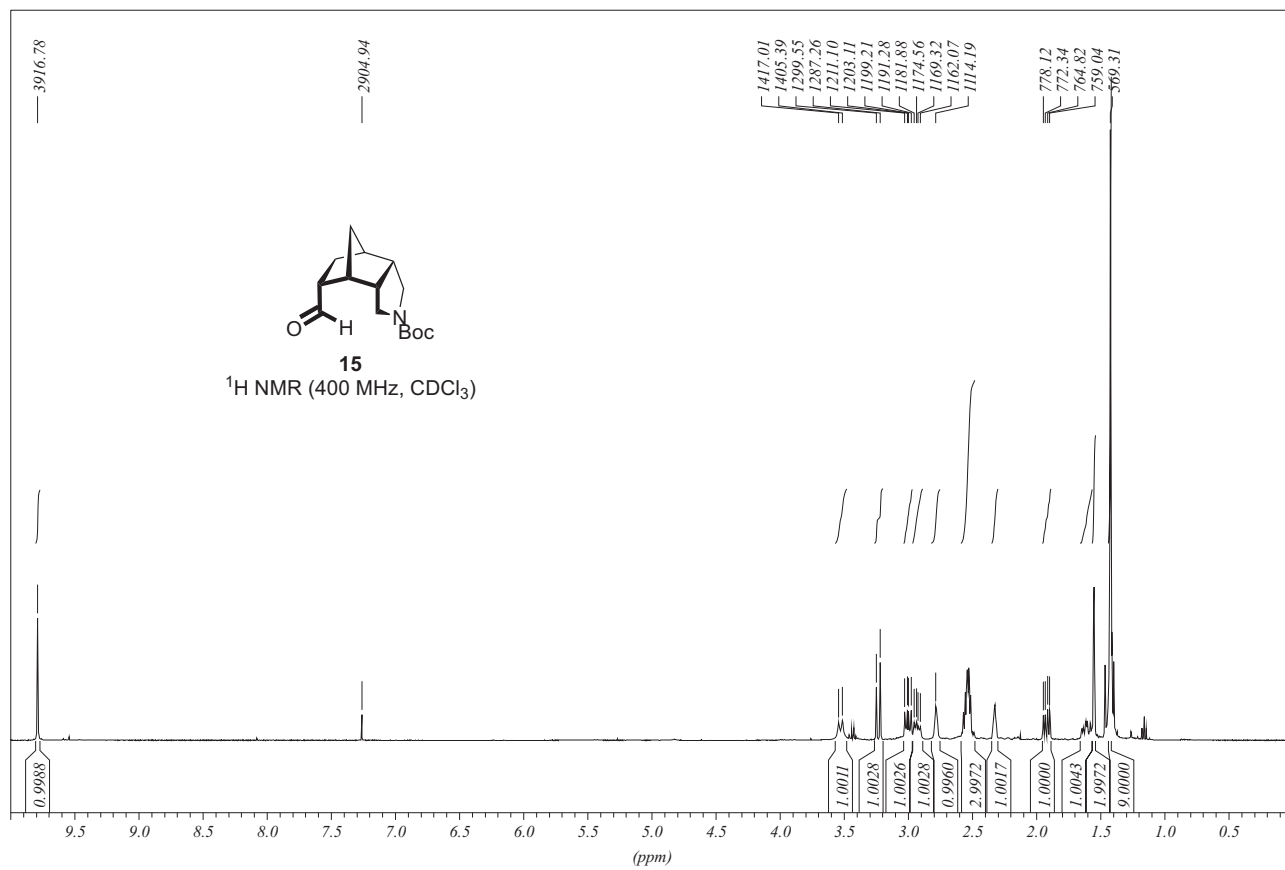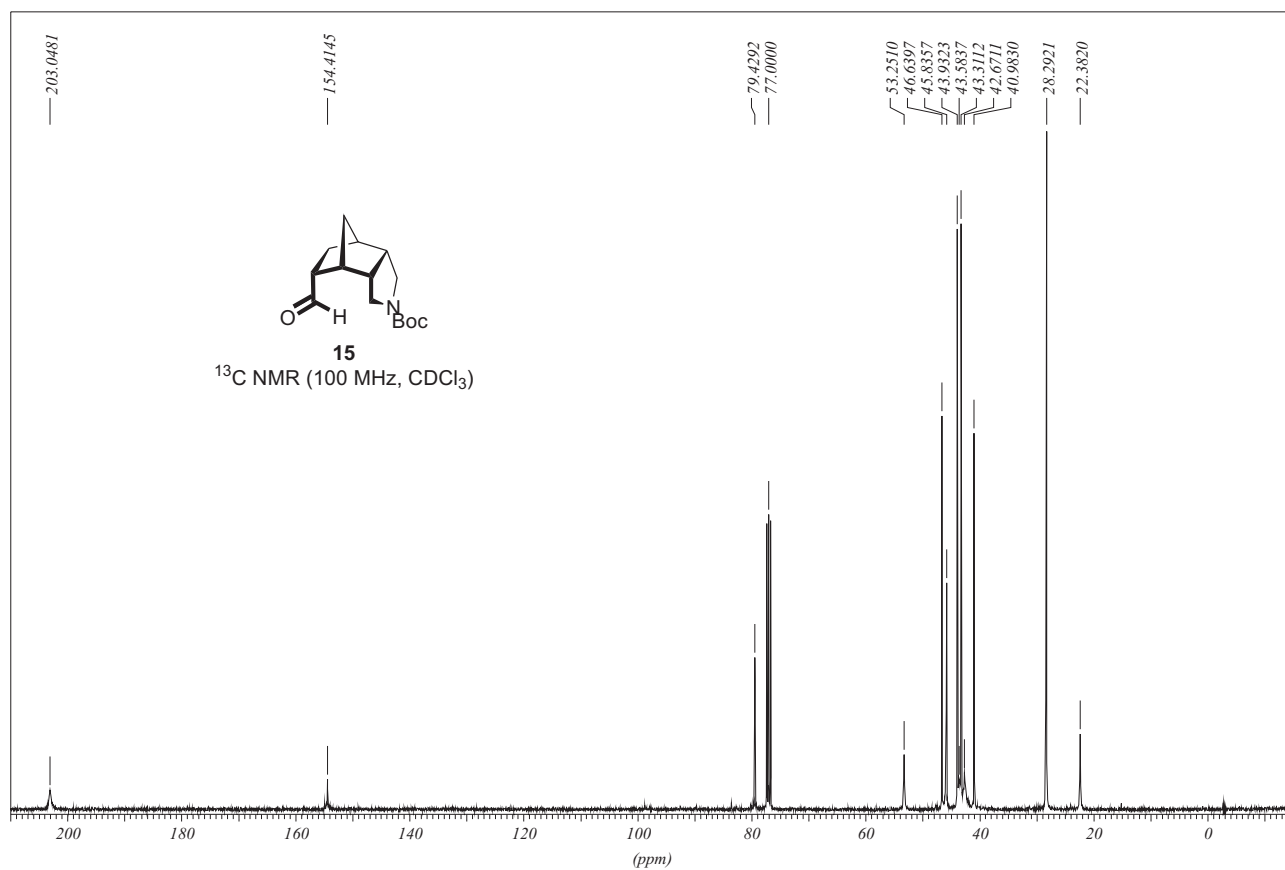

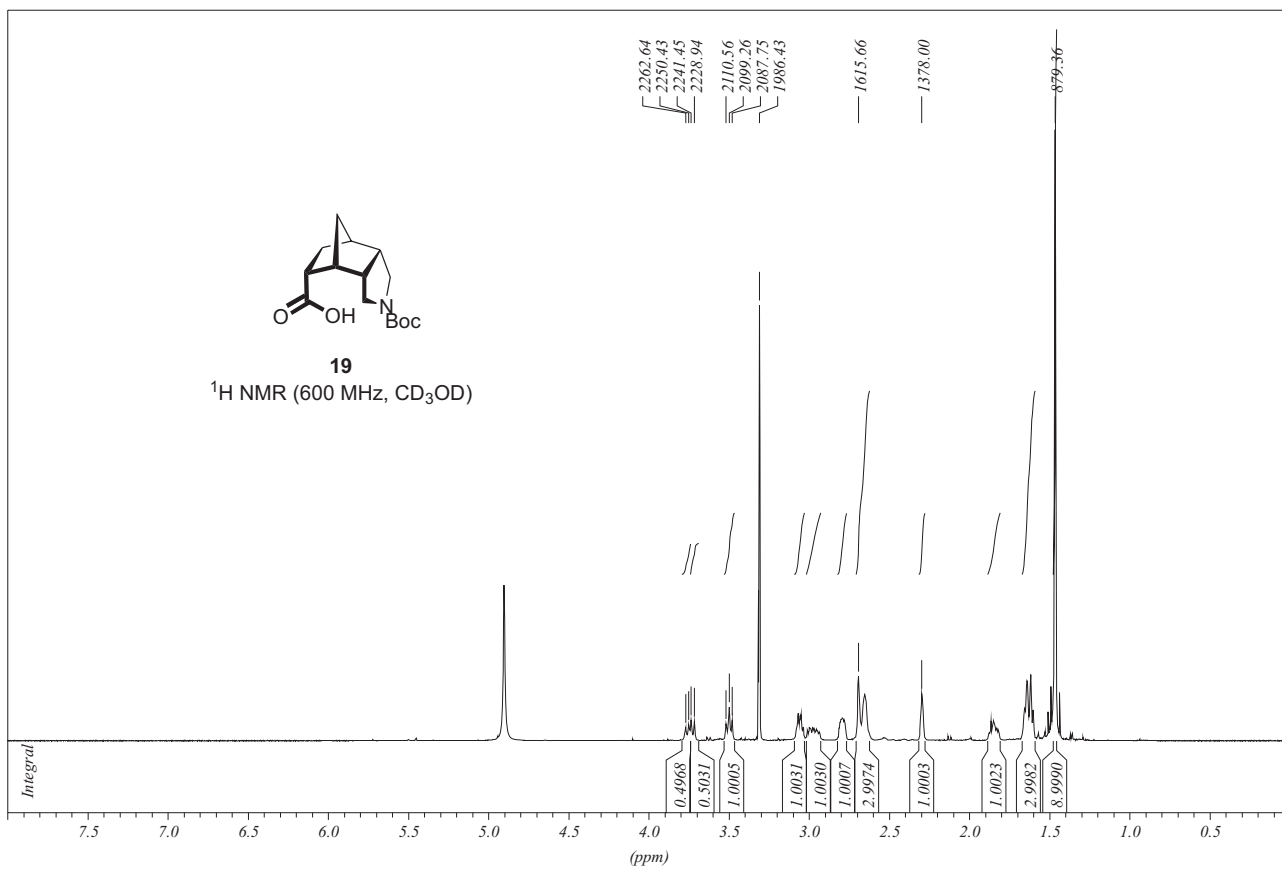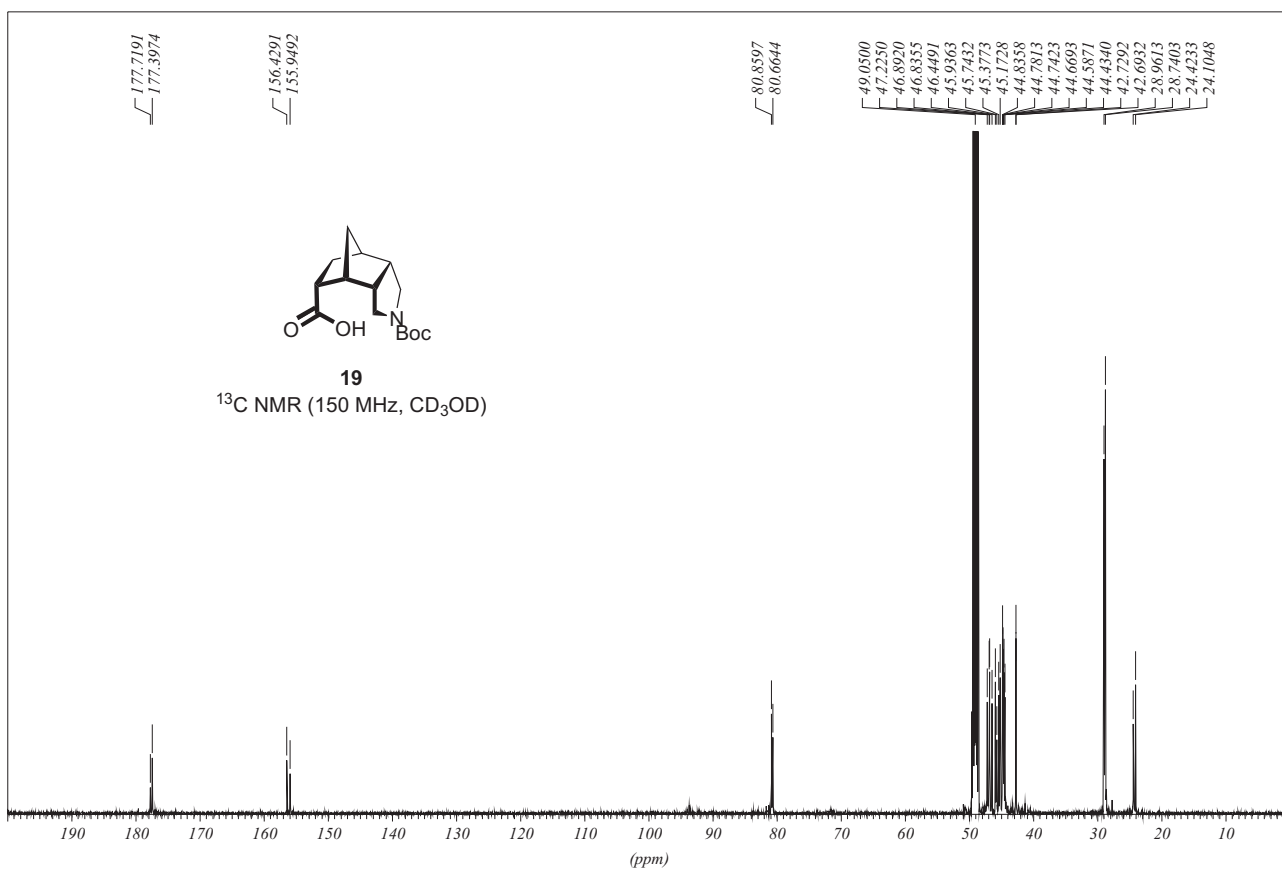

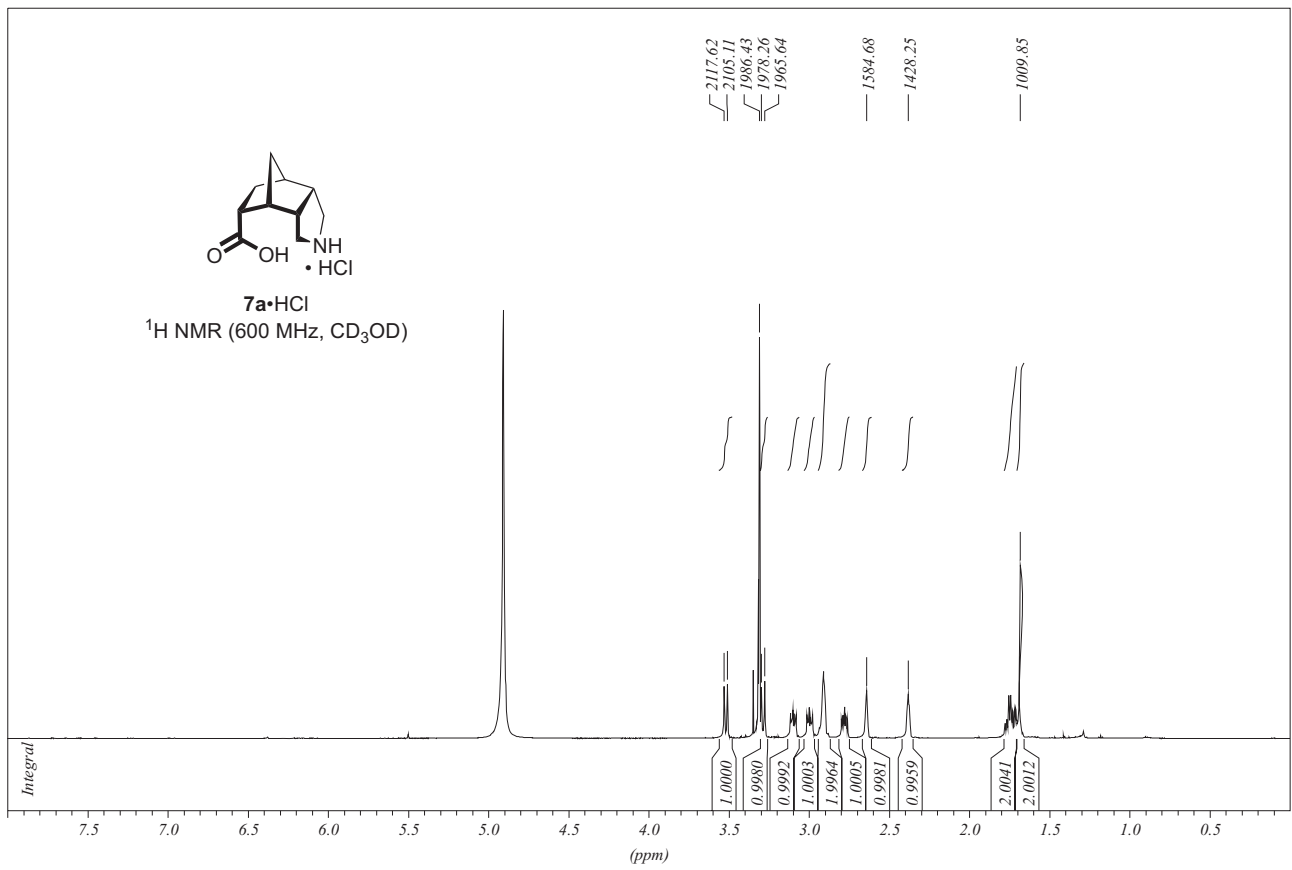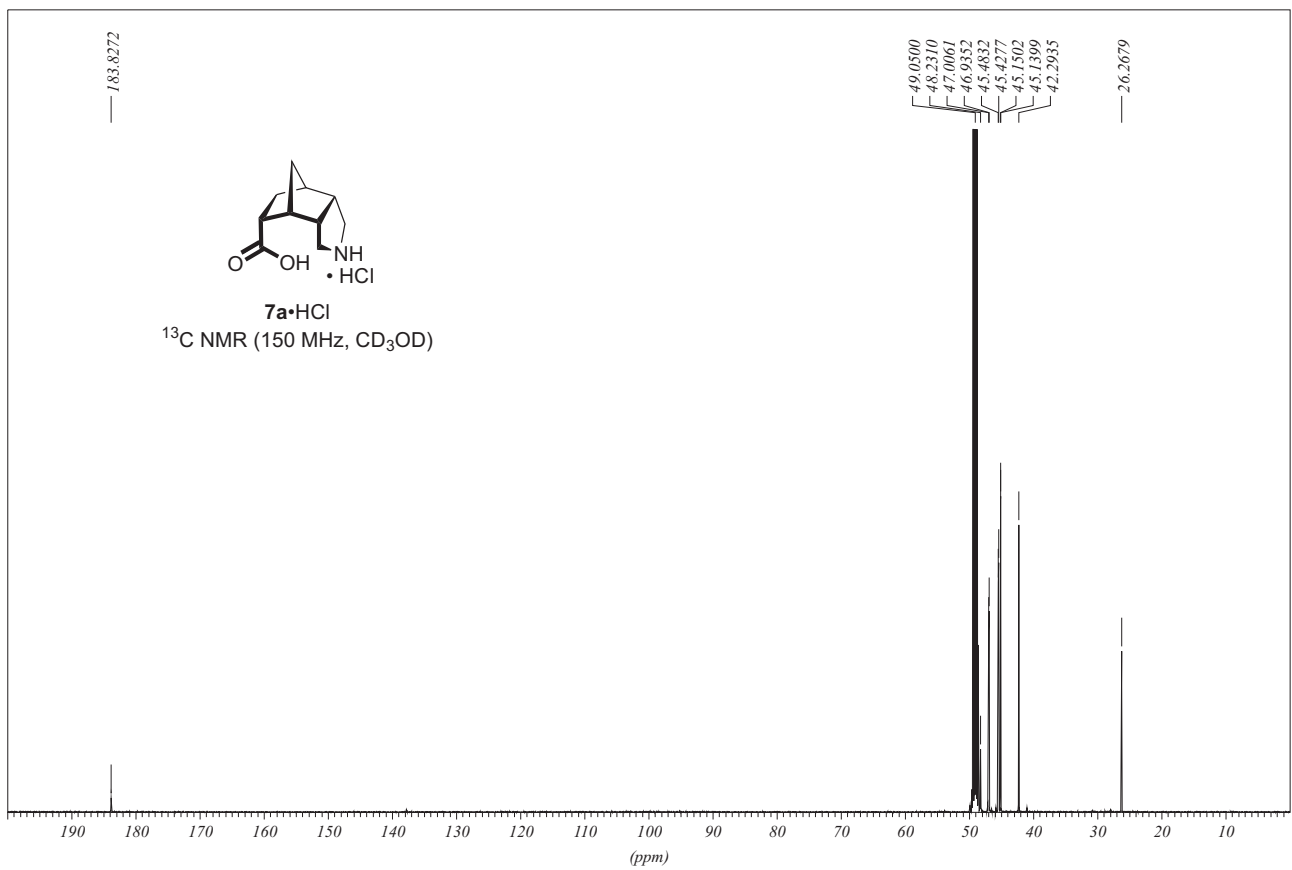

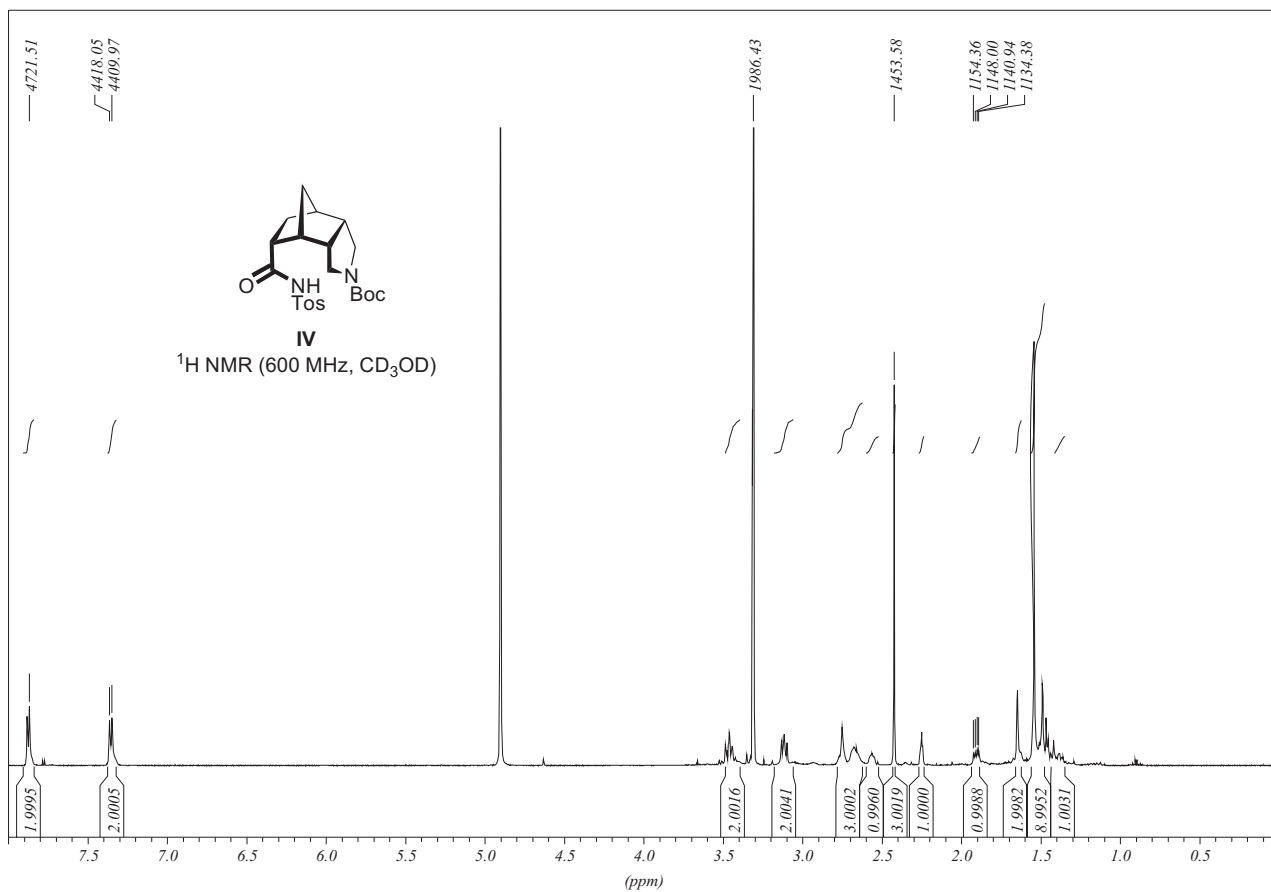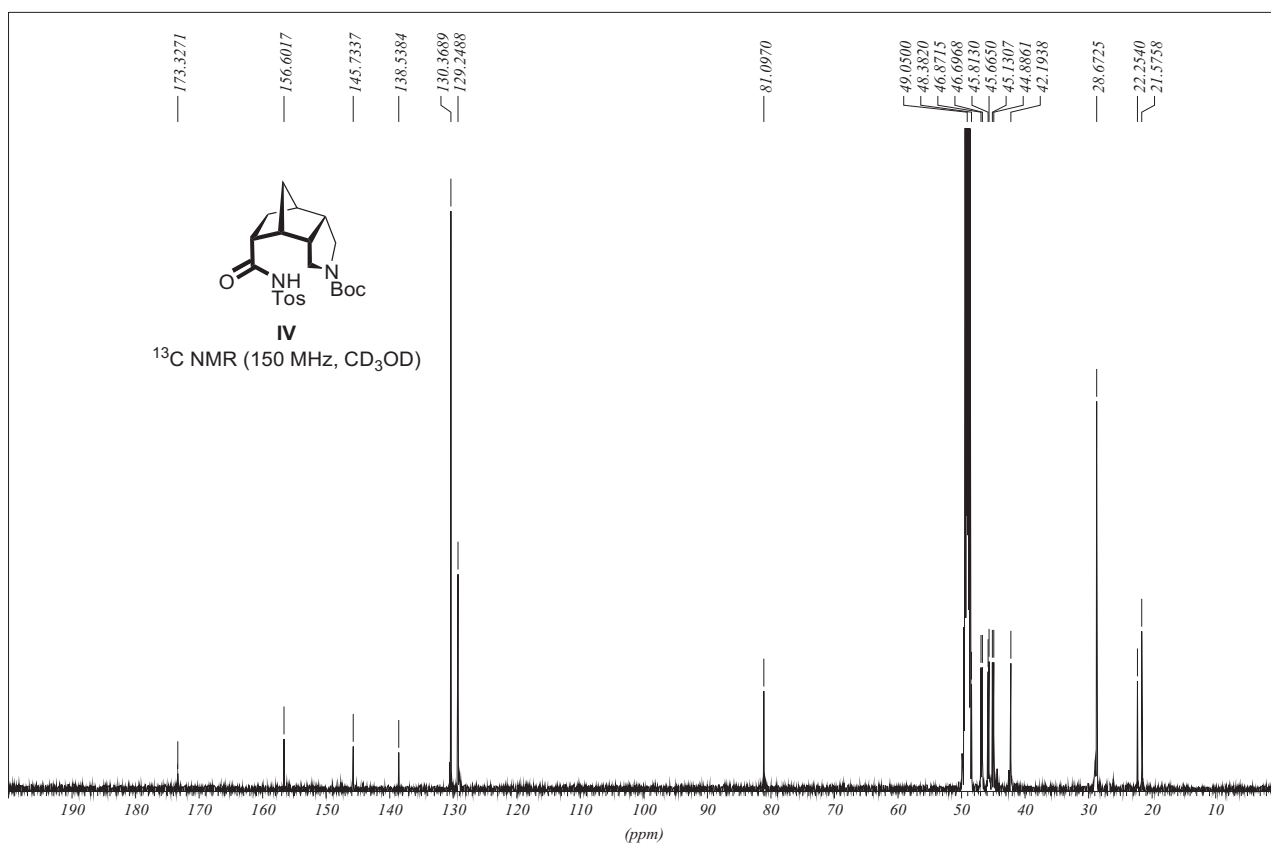

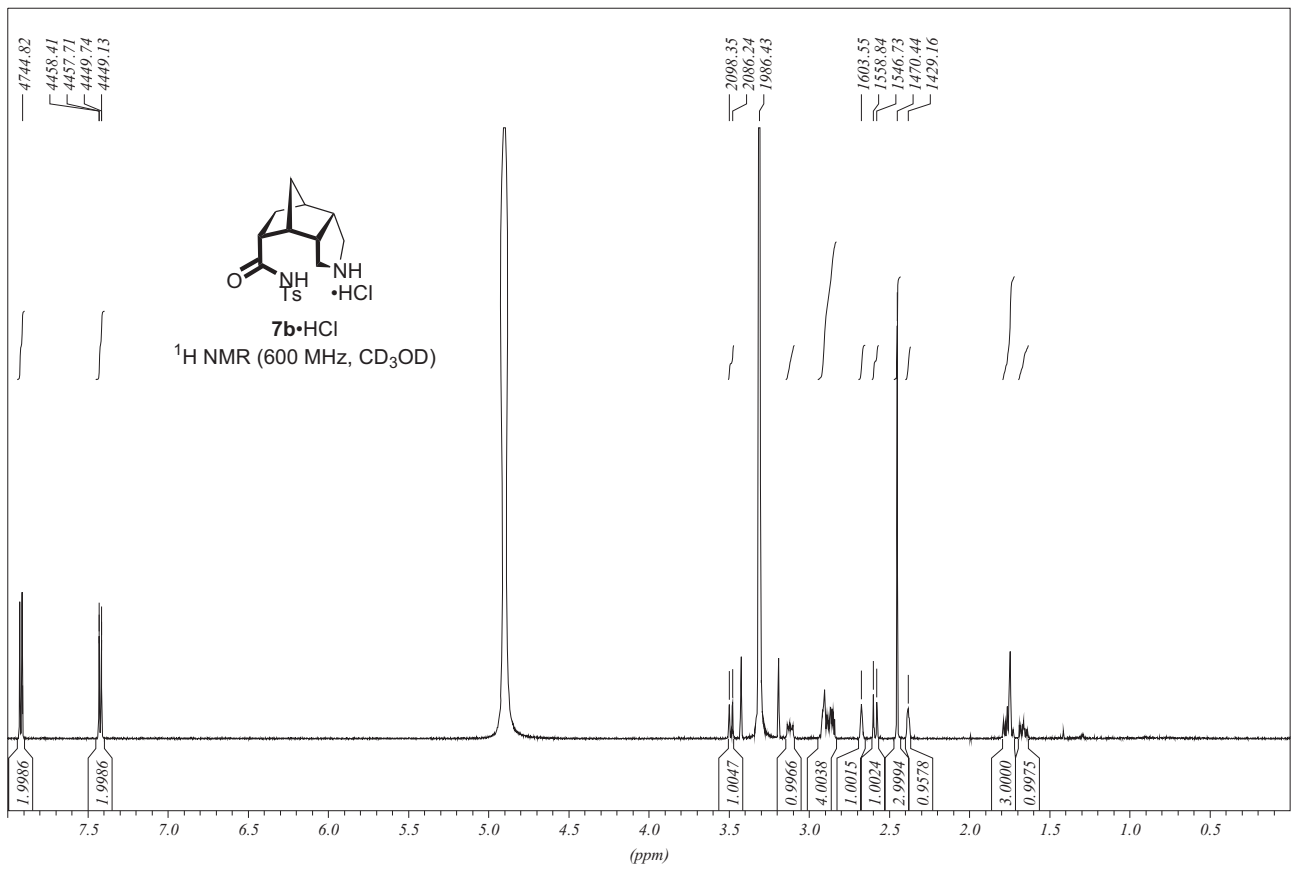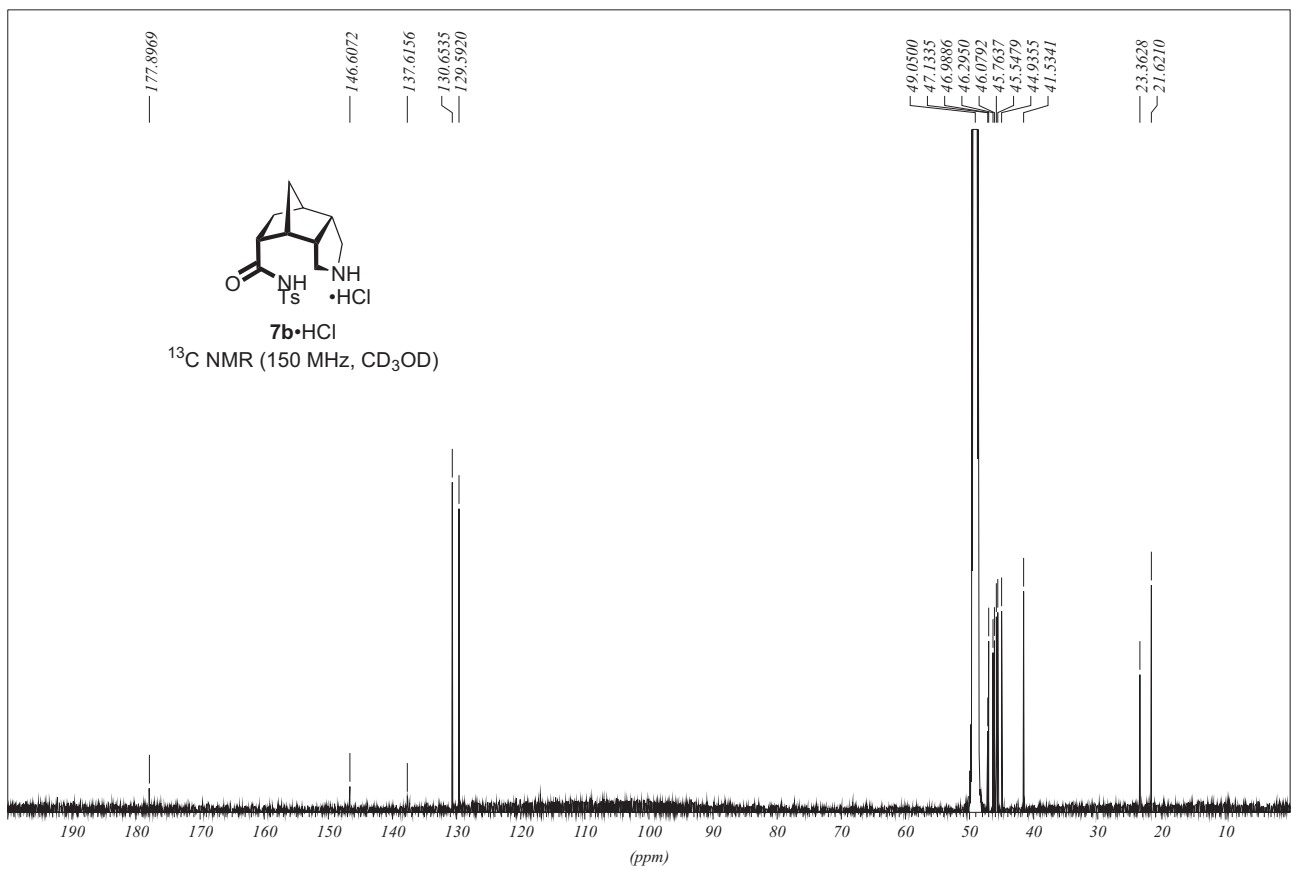

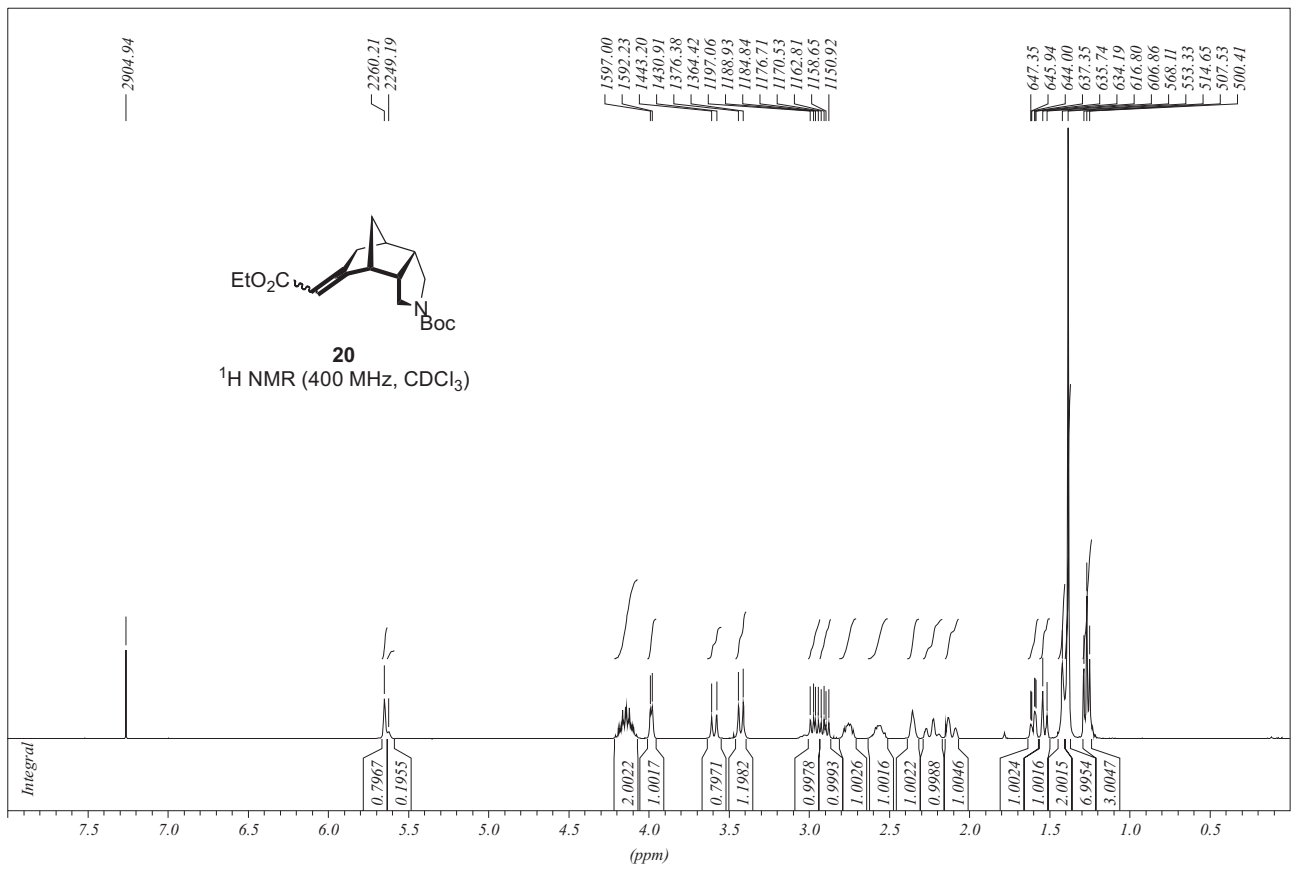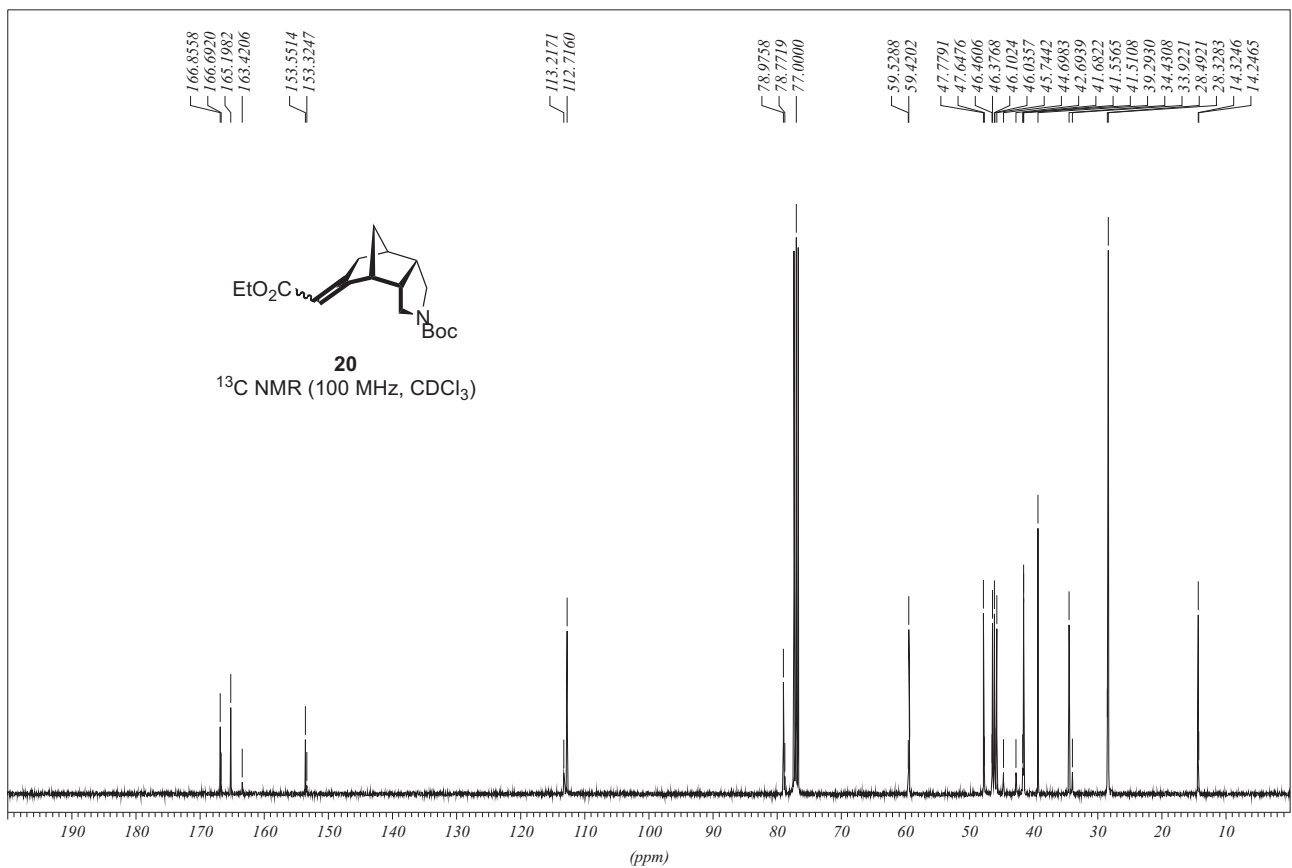



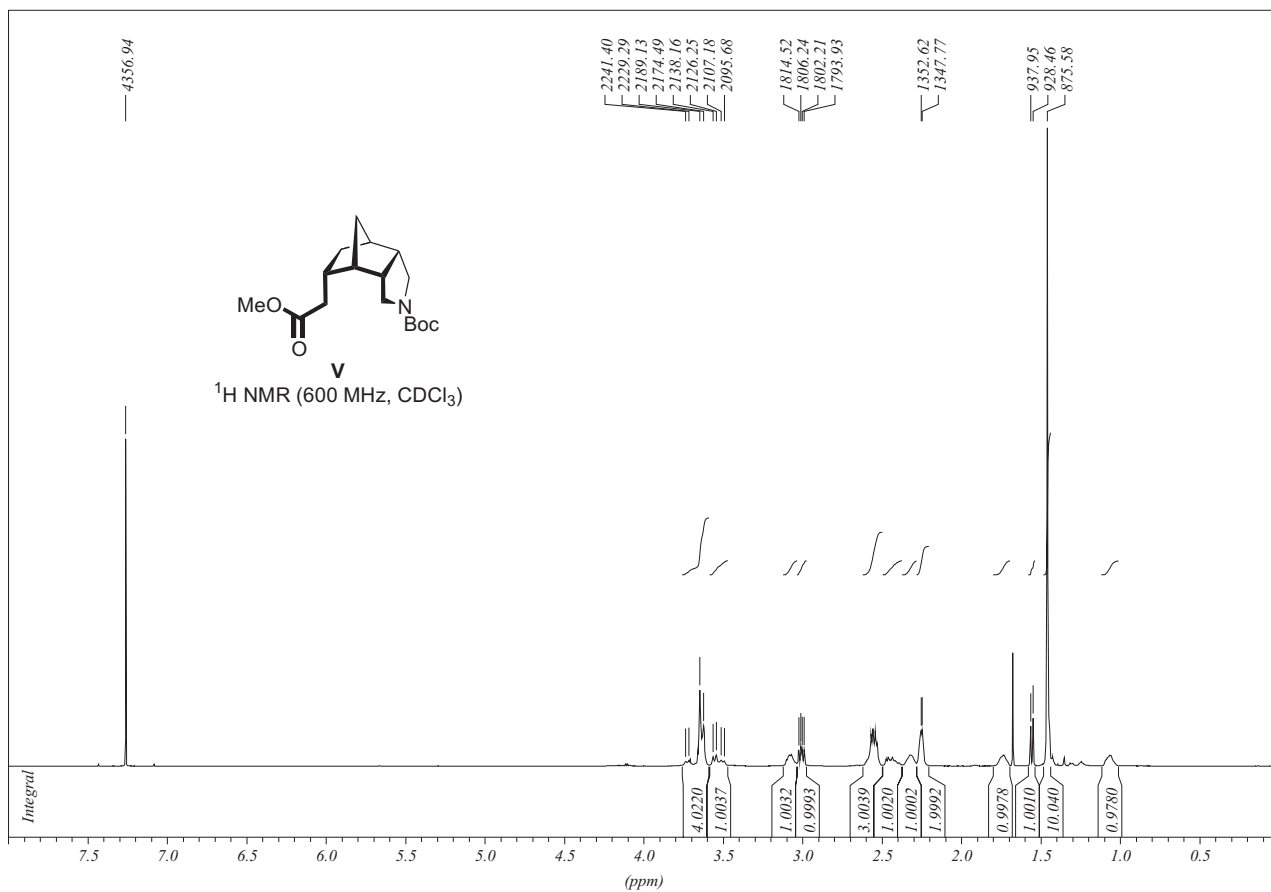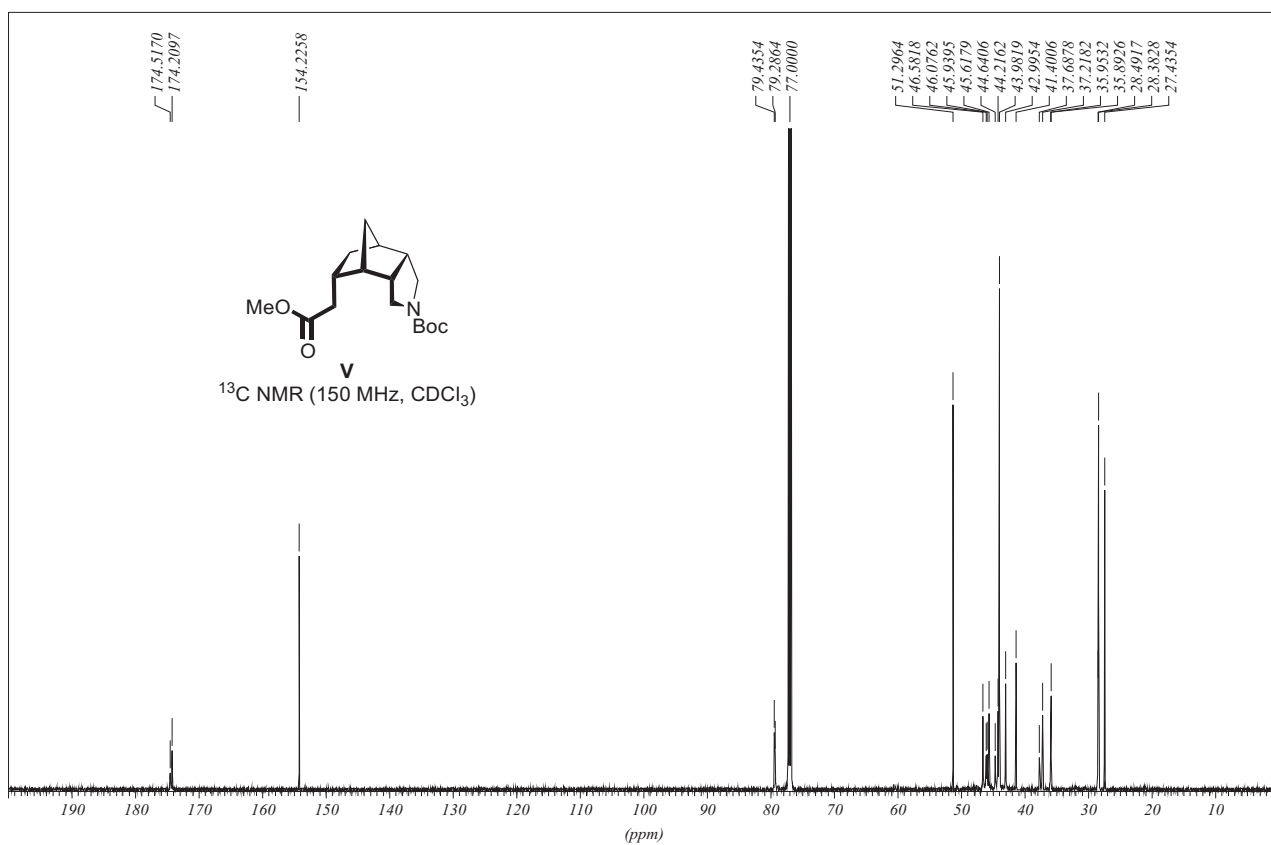

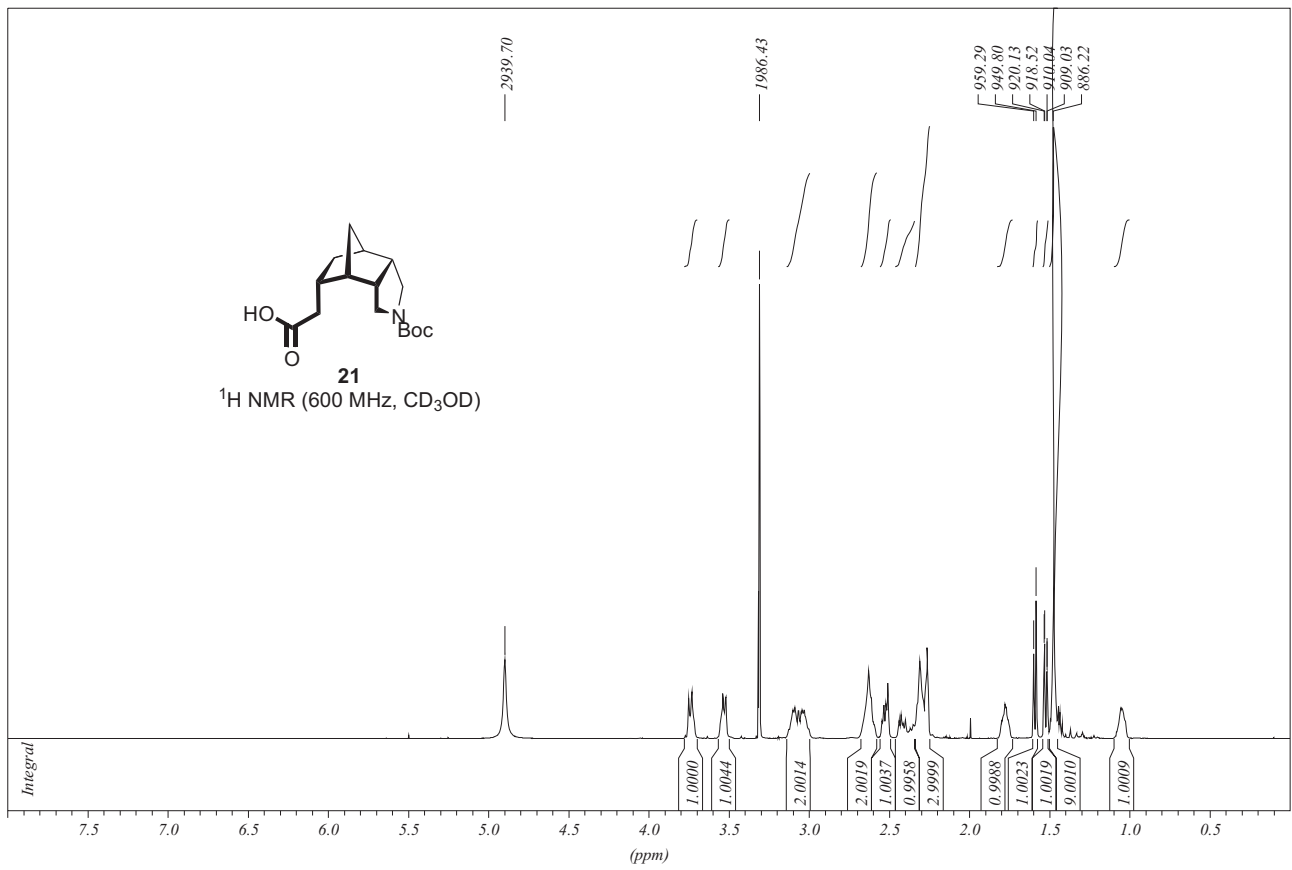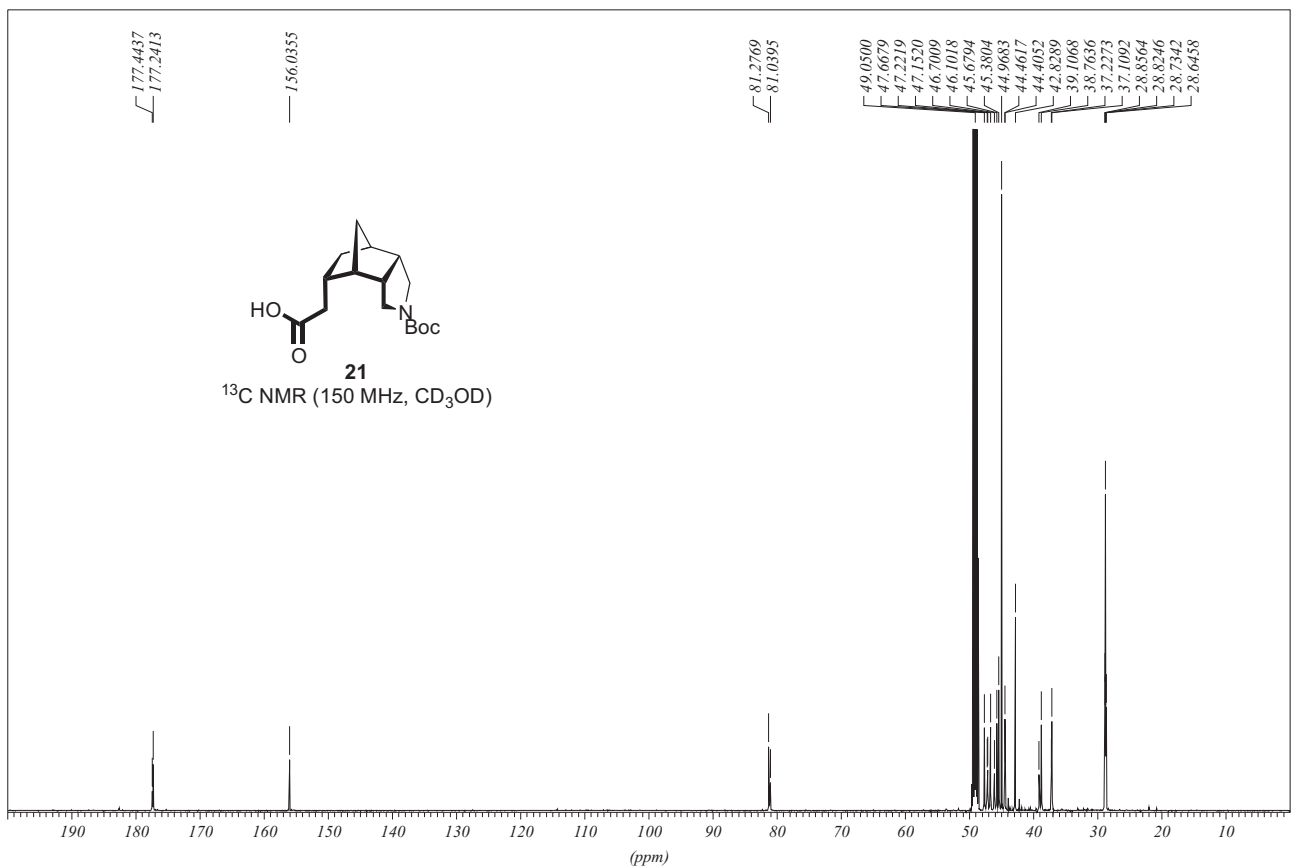

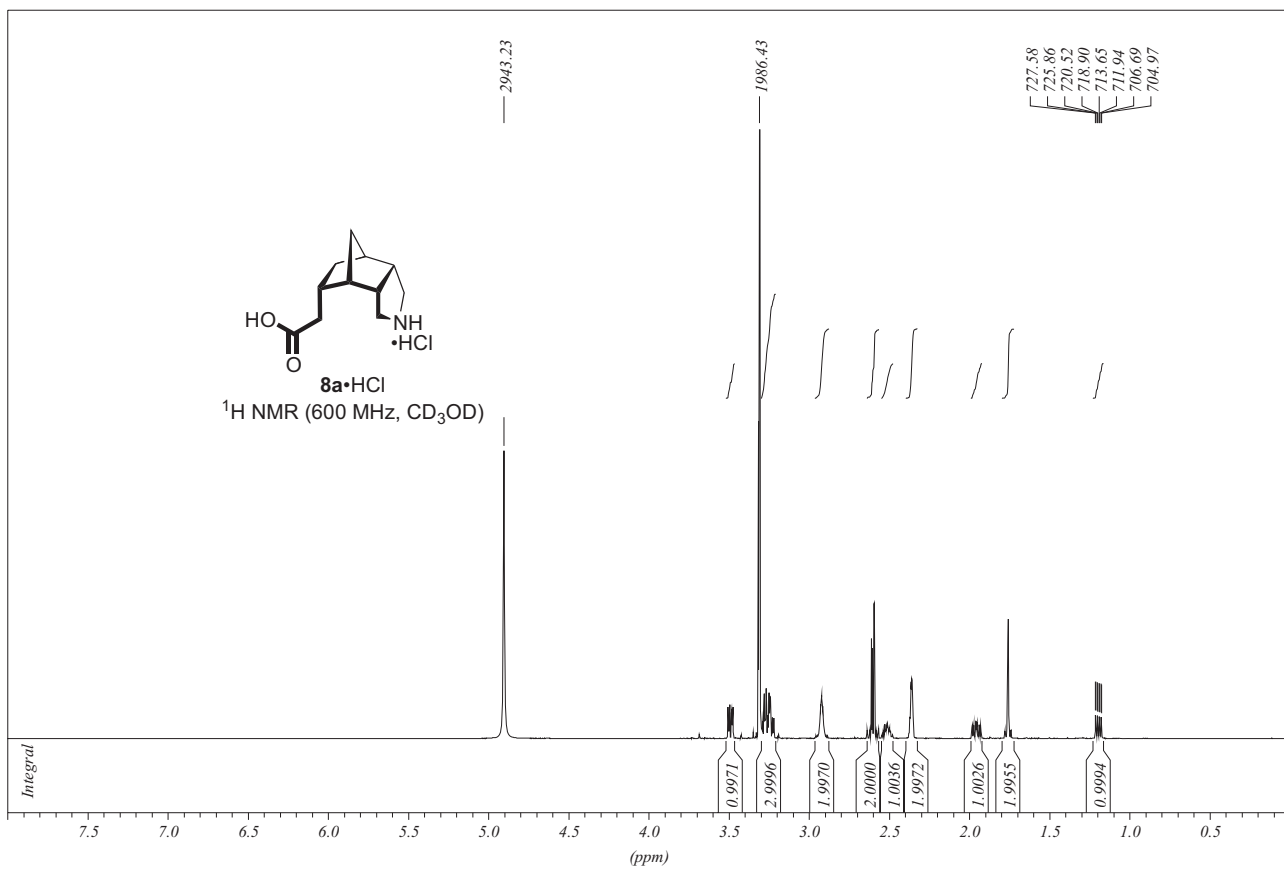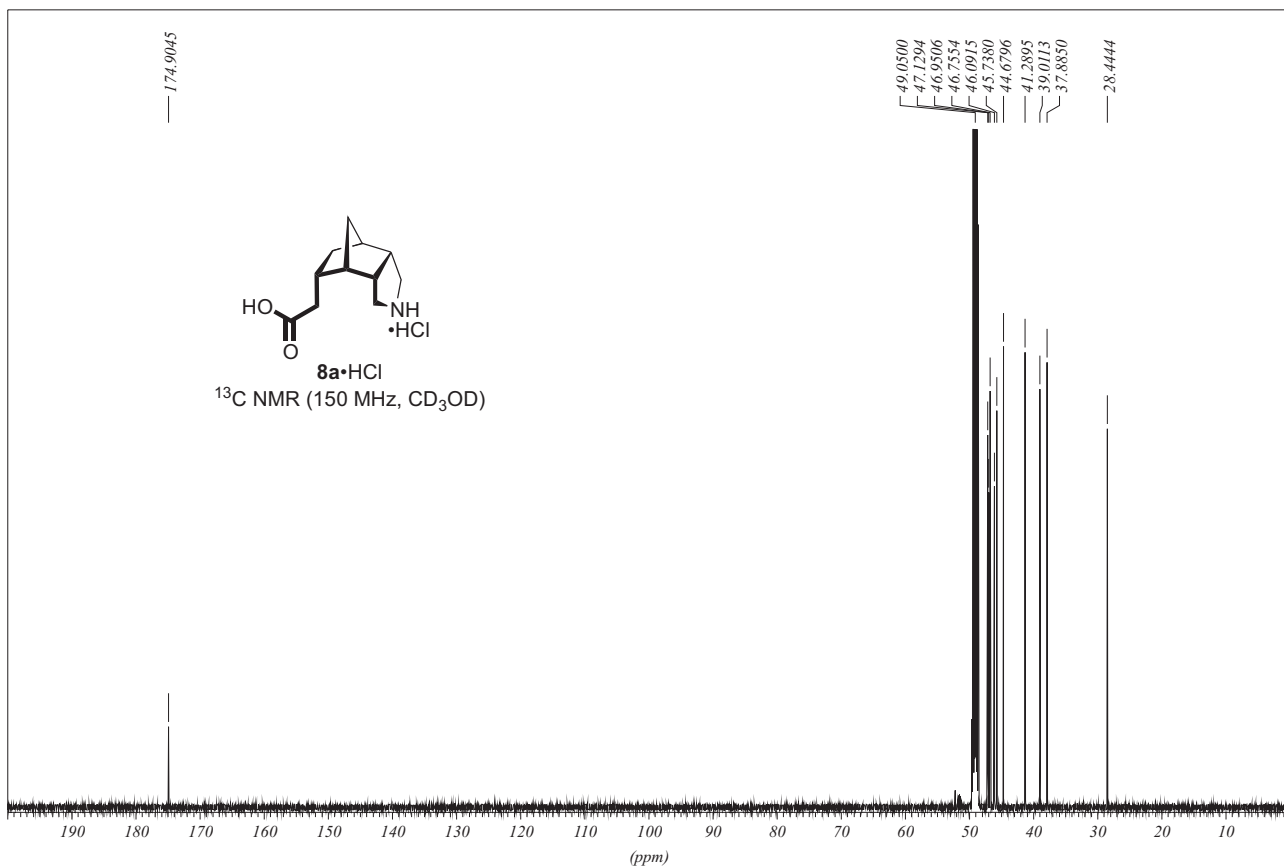

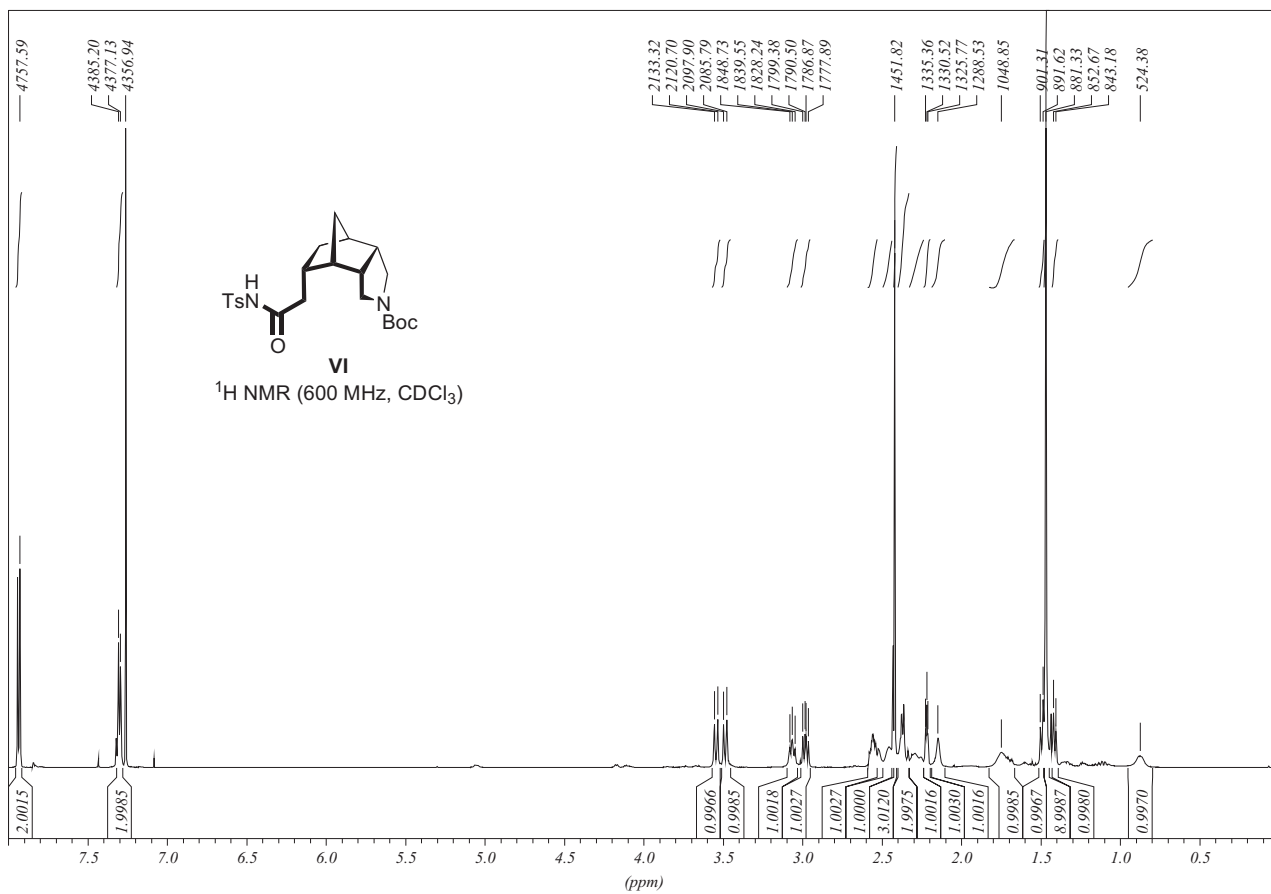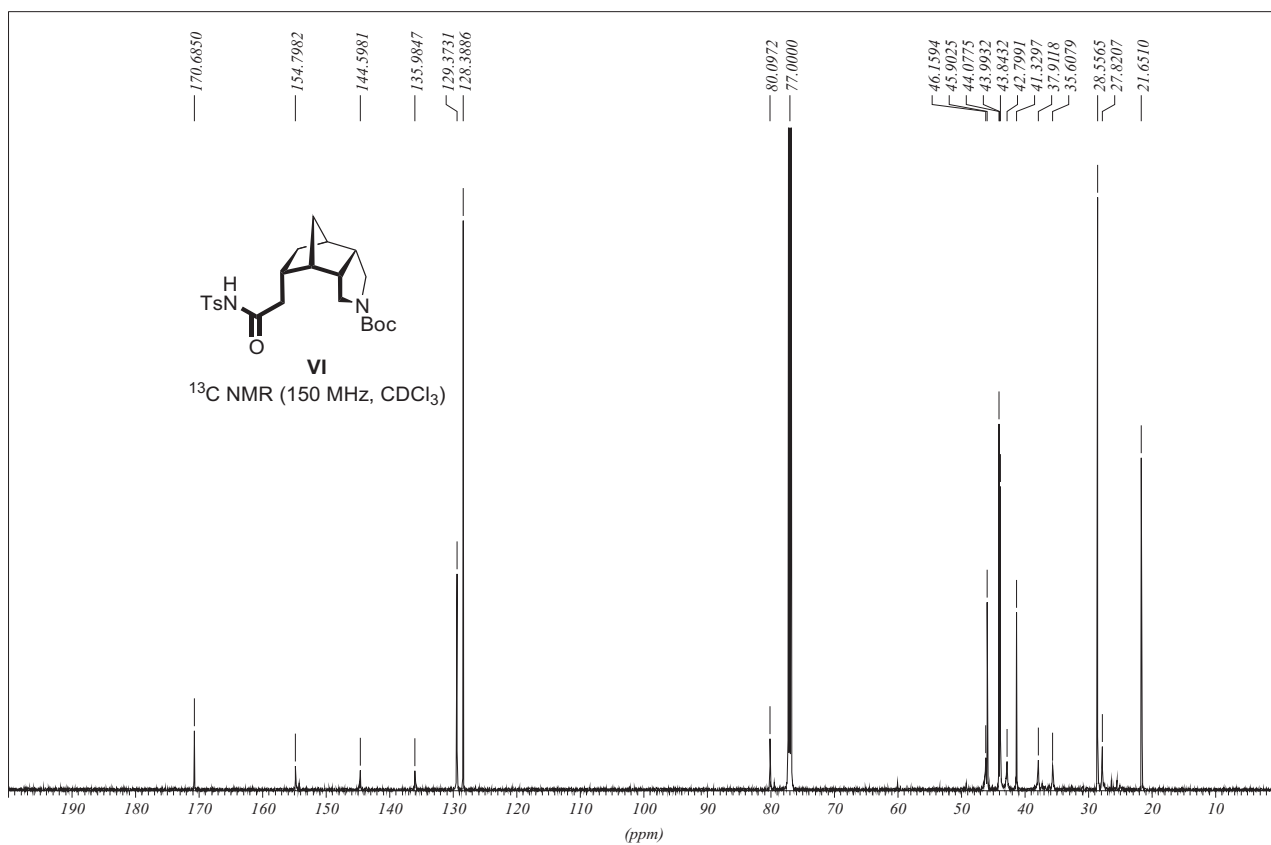

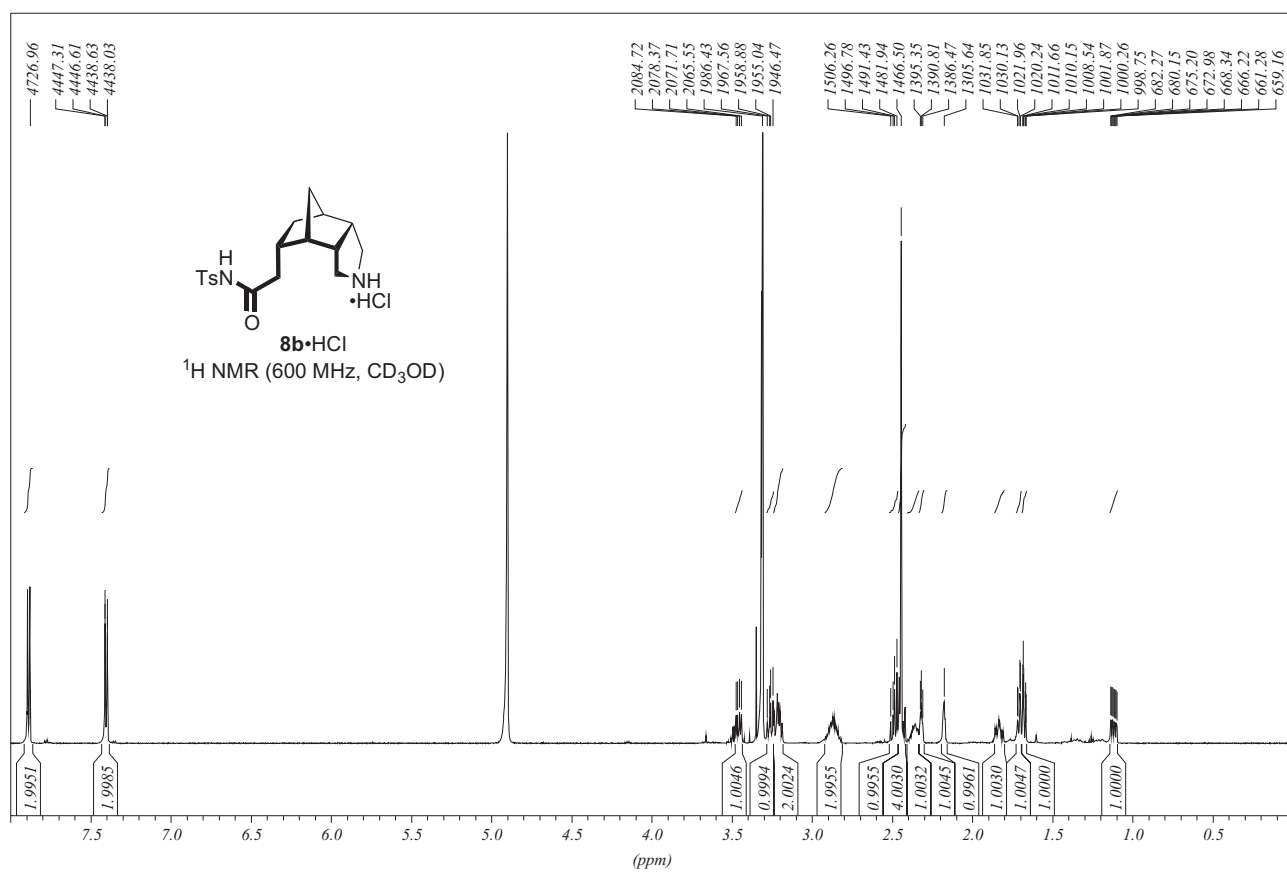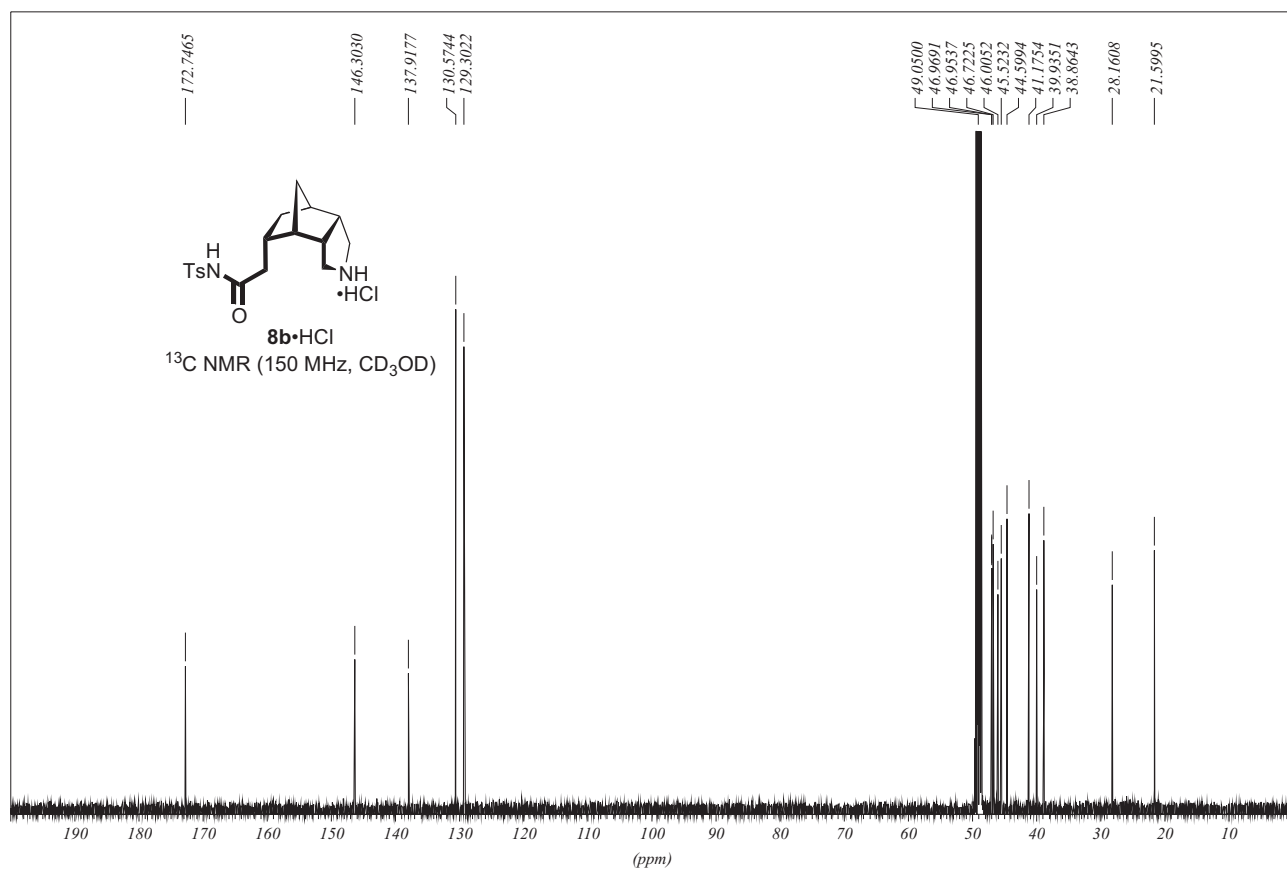

Supplement: Additional file 2 [file 1860-5397-5-81-S2.pdf]
