# Supplementary material for: Enantioselective synthesis of tricyclic amino acid derivatives based on a rigid 4-azatricyclo[5.2.1.02,6]decane skeleton
Source: publisher site journal article supplement (doi:10.3762/bjoc.5.81), 2009-12-21
Supplement: Additional file 3 [file 1860-5397-5-81-S3.pdf]

## Supporting Information File 3:

### Crystallographic data of the compounds **8a•MeOH** and **9**

#### Enantioselective synthesis of tricyclic amino acid derivatives based on a rigid 4-azatricyclo[5.2.1.0<sup>2,6</sup>]decane skeleton

Matthias Breuning<sup>\*,1</sup>, Tobias Häuser<sup>1</sup>, Christian Mehler<sup>1</sup>, Christian Däschlein<sup>2</sup>,  
Carsten Strohmann<sup>2</sup>, Andreas Oechsner<sup>3</sup> and Holger Braunschweig<sup>3</sup>

Address: <sup>1</sup>Institut für Organische Chemie, Universität Würzburg, Am Hubland,  
97074 Würzburg, Germany, <sup>2</sup>Anorganische Chemie, Universität Dortmund, Otto-Hahn-Str. 6,  
44227 Dortmund, Germany and <sup>3</sup>Institut für Anorganische Chemie, Universität Würzburg,  
Am Hubland, 97074 Würzburg, Germany

Email: Matthias Breuning\* - [breuning@chemie.uni-wuerzburg.de](mailto:breuning@chemie.uni-wuerzburg.de)

\* Corresponding author

## Table of Contents

|    |                                                        |    |
|----|--------------------------------------------------------|----|
| 1. | General Information.....                               | S3 |
| 2. | Crystallographic data of compound <b>9</b> .....       | S4 |
| 3. | Crystallographic data of compound <b>8a</b> •MeOH..... | S8 |

## 1. General Information

### 1.1 Crystal-Structure Determination of **9**

Crystal structure determination of **9** was accomplished on a Bruker APEX diffractometer (D8 three-circle goniometer) (Bruker AXS); data collection, cell determination and refinement: Smart version 5.622 (Bruker AXS, 2001); integration: SaintPlus version 6.02 (Bruker AXS, 1999); empirical absorption correction: Sadabs version 2.01 (Bruker AXS, 1999). The structures were solved by applying direct and Fourier methods, using SHELXS-908 [1] and SHELXL-97 [2]. The non-hydrogen atoms were refined anisotropically. All of the H-atoms were placed in geometrically calculated positions and each was assigned a fixed isotropic displacement parameter based on a riding-model. CCDC 743050 contains the detailed crystallographic data for this publication. This data may be obtained free of charge from the Cambridge Crystallographic Data Center through [www.ccdc.cam.ac.uk/data\\_request/cif](http://www.ccdc.cam.ac.uk/data_request/cif).

### 1.2 Crystal structure determination of **8a**•MeOH

The crystal data of **8a**•MeOH were collected at Bruker APEX diffractometer with CCD area detector and graphite monochromated MoK $\alpha$  radiation. The structure was solved using direct methods, refined with Shelx software package (G. Sheldrick, University of Göttingen 1997), and expanded using Fourier techniques. All non-hydrogen atoms were refined anisotropically. Hydrogen atoms were assigned idealized positions and were included in structure factors calculations.

Crystallographic data have been deposited with the Cambridge Crystallographic Data Center as supplementary publication no. CCDC 742656. These data can be obtained free of charge from The Cambridge Crystallographic Data Centre via [www.ccdc.cam.ac.uk/data\\_request/cif](http://www.ccdc.cam.ac.uk/data_request/cif).

- 
1. G. M. Sheldrick, SHELXS-90, *A Program for the Solution of Crystal Structures*, Universität Göttingen **1990**.
  2. G. M. Sheldrick, SHELXL-97, *A Program for Crystal Structure Refinement*, Universität Göttingen **1997**.

## 2. Crystallographic Data of compound **9**

| <b>Table 1: Crystal Data and Structural Refinement Details for compound <b>9</b>.</b> |                                                                     |
|---------------------------------------------------------------------------------------|---------------------------------------------------------------------|
| compound                                                                              | <b>9</b>                                                            |
| empirical formula                                                                     | C <sub>14</sub> H <sub>21</sub> NO <sub>3</sub>                     |
| molecular mass [g·mol <sup>-1</sup> ]                                                 | 251.32                                                              |
| temperature [K]                                                                       | 173(2)                                                              |
| wavelength [Å]                                                                        | 0.71073 Å                                                           |
| crystal system                                                                        | orthorhombic                                                        |
| space group (Nr.)                                                                     | <i>P</i> 2 <sub>1</sub> 2 <sub>1</sub> 2 <sub>1</sub> (19)          |
| <i>a</i> [Å]                                                                          | 10.407(2)                                                           |
| <i>b</i> [Å]                                                                          | 11.020(2)                                                           |
| <i>c</i> [Å]                                                                          | 11.661(3)                                                           |
| <i>V</i> [Å <sup>3</sup> ]                                                            | 1337.3(5)                                                           |
| <i>Z</i>                                                                              | 4                                                                   |
| calculated density $\rho$ [g·cm <sup>-3</sup> ]                                       | 1.248                                                               |
| absorption coefficient $\mu$ [mm <sup>-1</sup> ]                                      | 0.087                                                               |
| <i>F</i> (000)                                                                        | 544                                                                 |
| crystal size [mm <sup>3</sup> ]                                                       | 0.40 x 0.40 x 0.30                                                  |
| theta range for data collection $2\theta$ [°]                                         | 2.54 – 24.99                                                        |
| index ranges                                                                          | $-9 \leq h \leq 12$<br>$-11 \leq l \leq 13$<br>$-13 \leq k \leq 12$ |
| reflections collected                                                                 | 5399                                                                |
| independent reflections                                                               | 2335 ( $R_{\text{int}} = 0.0370$ )                                  |
| refinement method                                                                     | Full-matrix least-squares on $F^2$                                  |
| data / restraints / parameter                                                         | 2335 / 0 / 166                                                      |
| goodness-of-fit on $F^2$                                                              | 1.012                                                               |
| final <i>R</i> -values [ $I > 2\sigma(I)$ ]                                           | $R1 = 0.0380$ ,<br>$wR2 = 0.0782$                                   |
| <i>R</i> -values (all data)                                                           | $R1 = 0.0462$ ,<br>$wR2 = 0.0807$                                   |
| Absolute structure parameter                                                          | 0.2(13)                                                             |
| largest diff. peak and hole [e·Å <sup>-3</sup> ]                                      | 0.176 and -0.168                                                    |

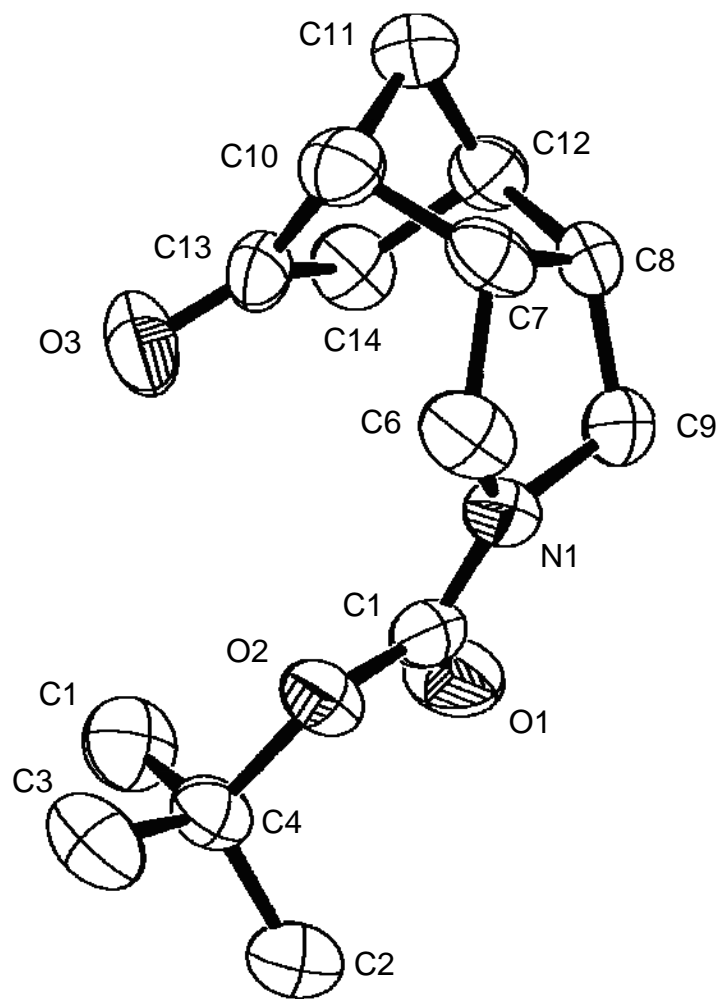

**Figure 1:** ORTEP plot of the asymmetric unit of compound **9** at 50 % probability level. H atoms were omitted for clarity.

**Table 2:** Atomic coordinates ( $\times 10^4$ ) and equivalent isotropic displacement parameters ( $\text{\AA}^2 \times 10^3$ ) for compound **9**.

| Atom  | x       | y        | z       | U(eq) |
|-------|---------|----------|---------|-------|
| C(1)  | 7498(2) | -696(2)  | 2799(2) | 68(1) |
| C(2)  | 8881(2) | -1384(2) | 4444(2) | 71(1) |
| C(3)  | 6511(2) | -1137(2) | 4698(2) | 67(1) |
| C(4)  | 7706(2) | -680(2)  | 4078(2) | 47(1) |
| C(5)  | 8658(2) | 1349(2)  | 4054(2) | 48(1) |
| C(6)  | 7332(2) | 2916(2)  | 5075(2) | 54(1) |
| C(7)  | 7038(2) | 4150(2)  | 4547(2) | 49(1) |
| C(8)  | 8278(2) | 4535(2)  | 3898(2) | 48(1) |
| C(9)  | 9230(2) | 3518(2)  | 4086(2) | 64(1) |
| C(10) | 6013(2) | 4174(2)  | 3606(2) | 51(1) |
| C(11) | 6470(2) | 5260(2)  | 2894(2) | 56(1) |
| C(12) | 7799(2) | 4746(2)  | 2674(2) | 47(1) |
| C(14) | 6296(2) | 3147(2)  | 2803(2) | 49(1) |
| C(13) | 7454(2) | 3532(2)  | 2117(2) | 55(1) |
| N(1)  | 8431(2) | 2491(1)  | 4421(2) | 51(1) |
| O(1)  | 9537(1) | 1073(1)  | 3431(2) | 73(1) |
| O(2)  | 7789(1) | 575(1)   | 4491(1) | 48(1) |
| O(3)  | 5733(2) | 2194(1)  | 2724(1) | 76(1) |

| <b>Table 3:</b> Anisotropic displacement parameters ( $\text{\AA}^2 \cdot 10^3$ ) compound <b>9</b> . |          |          |          |          |          |          |
|-------------------------------------------------------------------------------------------------------|----------|----------|----------|----------|----------|----------|
| Atom                                                                                                  | $U^{11}$ | $U^{22}$ | $U^{33}$ | $U^{23}$ | $U^{13}$ | $U^{12}$ |
| C(1)                                                                                                  | 85(2)    | 65(1)    | 54(1)    | -15(1)   | 0(1)     | 2(1)     |
| C(2)                                                                                                  | 75(2)    | 45(1)    | 93(2)    | 6(1)     | -9(1)    | 7(1)     |
| C(3)                                                                                                  | 78(1)    | 44(1)    | 80(2)    | -6(1)    | 11(1)    | -8(1)    |
| C(4)                                                                                                  | 58(1)    | 36(1)    | 48(1)    | -4(1)    | 1(1)     | 1(1)     |
| C(5)                                                                                                  | 44(1)    | 46(1)    | 54(1)    | 10(1)    | -8(1)    | 3(1)     |
| C(6)                                                                                                  | 82(2)    | 46(1)    | 35(1)    | 1(1)     | 4(1)     | -3(1)    |
| C(7)                                                                                                  | 73(1)    | 35(1)    | 39(1)    | -6(1)    | 6(1)     | 0(1)     |
| C(8)                                                                                                  | 51(1)    | 36(1)    | 58(1)    | 0(1)     | -14(1)   | -8(1)    |
| C(9)                                                                                                  | 47(1)    | 48(1)    | 97(2)    | 11(1)    | -22(1)   | -10(1)   |
| C(10)                                                                                                 | 41(1)    | 51(1)    | 62(1)    | 3(1)     | 7(1)     | 4(1)     |
| C(11)                                                                                                 | 59(1)    | 48(1)    | 62(1)    | 7(1)     | -10(1)   | 5(1)     |
| C(12)                                                                                                 | 50(1)    | 44(1)    | 47(1)    | 12(1)    | 4(1)     | -5(1)    |
| C(14)                                                                                                 | 48(1)    | 51(1)    | 50(1)    | 3(1)     | -18(1)   | -9(1)    |
| C(13)                                                                                                 | 75(1)    | 57(1)    | 33(1)    | 1(1)     | -1(1)    | -4(1)    |
| N(1)                                                                                                  | 48(1)    | 37(1)    | 67(1)    | 10(1)    | -10(1)   | -2(1)    |
| O(1)                                                                                                  | 51(1)    | 55(1)    | 114(1)   | 9(1)     | 19(1)    | 10(1)    |
| O(2)                                                                                                  | 64(1)    | 36(1)    | 44(1)    | 1(1)     | 2(1)     | -4(1)    |
| O(3)                                                                                                  | 76(1)    | 63(1)    | 90(1)    | -8(1)    | -17(1)   | -26(1)   |

### 3. Crystallographic data of compound **8a**•MeOH

**Table 4:** Crystal Data and Structural Refinement Details for compound **8a**•MeOH.

|                                                             |                                                                 |
|-------------------------------------------------------------|-----------------------------------------------------------------|
| compound                                                    | <b>8a</b> •MeOH                                                 |
| empirical formula                                           | C <sub>11</sub> H <sub>17</sub> NO <sub>2</sub> •MeOH           |
| molecular mass [g·mol <sup>-1</sup> ]                       | 227.30                                                          |
| temperature [K]                                             | 168(2)                                                          |
| wavelength [Å]                                              | 0.71073                                                         |
| crystal system                                              | monoclinic                                                      |
| space group (Nr.)                                           | <i>P</i> 2 <sub>1</sub> (4)                                     |
| <i>a</i> [Å]                                                | 7.0427(5)                                                       |
| <i>b</i> [Å]                                                | 8.5362(6)                                                       |
| <i>c</i> [Å]                                                | 9.9706(7)                                                       |
| β [°]                                                       | 99.6710(10)                                                     |
| <i>V</i> [Å <sup>3</sup> ]                                  | 590.89(7)                                                       |
| <i>Z</i>                                                    | 2                                                               |
| calculated density ρ [g·m <sup>-3</sup> ]                   | 1.278                                                           |
| absorption coefficient μ [mm <sup>-1</sup> ]                | 0.091                                                           |
| <i>F</i> (000)                                              | 248                                                             |
| crystal size [mm <sup>3</sup> ]                             | 0.35 x 0.12 x 0.12                                              |
| theta range for data collection 2θ[°]                       | 2.07 – 28.33                                                    |
| index ranges                                                | -9 ≤ <i>h</i> ≤ 9, -11 ≤ <i>k</i> ≤ 11<br>-13 ≤ <i>l</i> ≤ 13   |
| reflections collected                                       | 14679                                                           |
| independent reflections                                     | 2942 ( <i>R</i> <sub>int</sub> = 0.0314)                        |
| completeness to theta = 26.00° [%]                          | 100.0                                                           |
| absorption correction                                       | semi-empirical from equivalents                                 |
| minimum/maximum transmission                                | 0.989 and 0.86316953                                            |
| refinement method                                           | Full-matrix least-squares on <i>F</i> <sup>2</sup>              |
| data / restraints / parameters                              | 2942 / 1 / 148                                                  |
| goodness-of-fit on <i>F</i> <sup>2</sup>                    | 1.040                                                           |
| final <i>R</i> -values indices [ <i>I</i> > 2σ( <i>I</i> )] | <i>R</i> <sub>1</sub> = 0.0343, <i>wR</i> <sup>2</sup> = 0.0905 |
| <i>R</i> -values (all data)                                 | <i>R</i> <sub>1</sub> = 0.0350, <i>wR</i> <sup>2</sup> = 0.0910 |
| Absolute structure parameter                                | 0.0(8)                                                          |
| Largest diff. peak and hole [e·Å <sup>-3</sup> ]            | 0.275 and -0.154                                                |



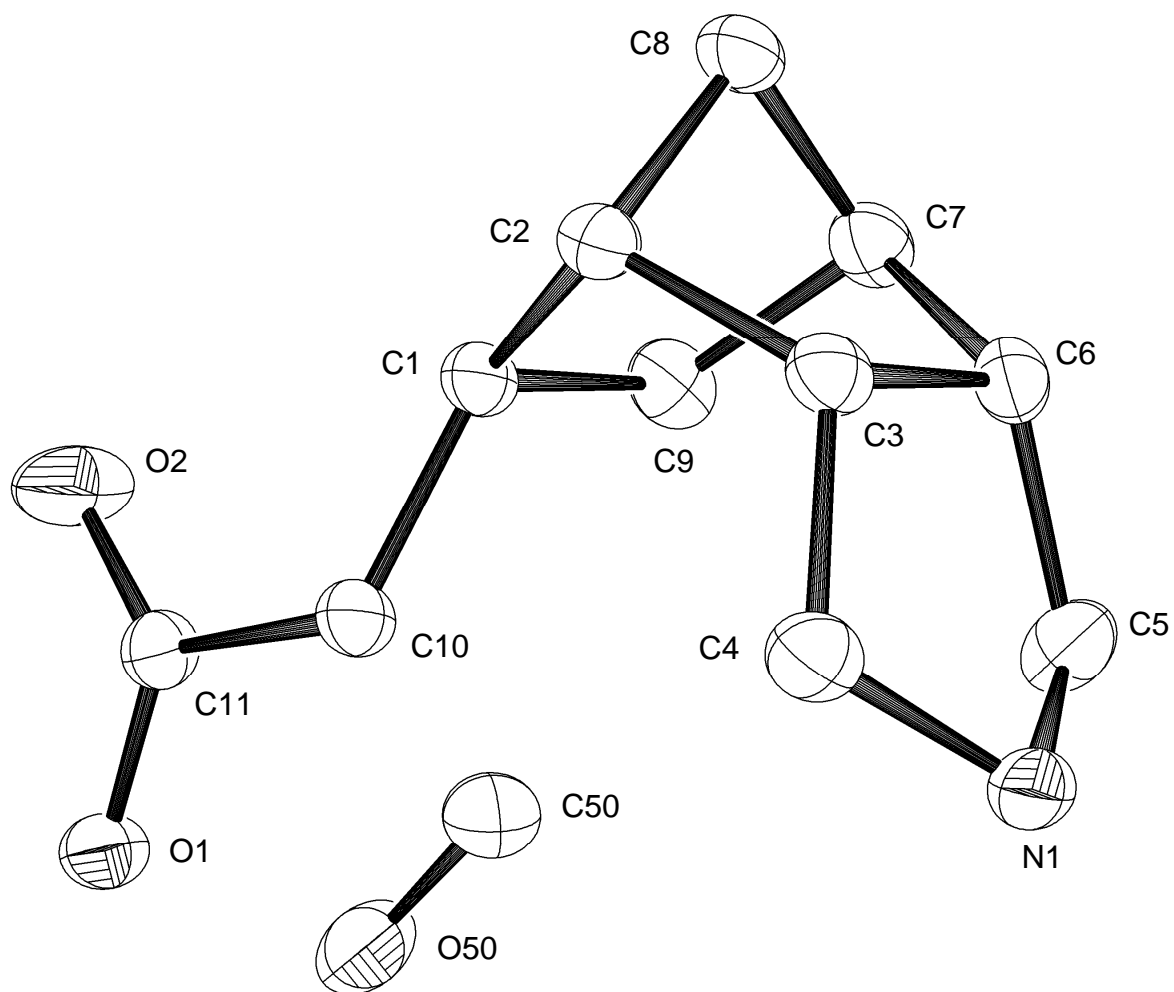

**Figure 2:** ORTEP plot of the asymmetric unit of compound **8a**•MeOH at 50 % probability level. H atoms were omitted for clarity.

**Table 5:** Atomic coordinates ( $\times 10^4$ ) and equivalent isotropic displacement parameters ( $\text{\AA}^2 \times 10^3$ ) for **8a**•MeOH.

| Atom  | x        | y        | z       | U(eq) |
|-------|----------|----------|---------|-------|
| O(1)  | 6424(1)  | -169(1)  | 396(1)  | 28(1) |
| N(1)  | 6273(1)  | 6632(1)  | 1112(1) | 26(1) |
| C(1)  | 9489(2)  | 2804(1)  | 2385(1) | 22(1) |
| O(2)  | 9153(2)  | -453(1)  | 1833(1) | 47(1) |
| C(2)  | 10701(2) | 4293(1)  | 2251(1) | 23(1) |
| C(3)  | 9562(2)  | 5817(1)  | 1878(1) | 21(1) |
| C(4)  | 7982(2)  | 5931(1)  | 622(1)  | 25(1) |
| C(5)  | 6393(2)  | 6189(2)  | 2582(1) | 31(1) |
| C(6)  | 8552(2)  | 6113(1)  | 3142(1) | 24(1) |
| C(7)  | 9353(2)  | 4775(1)  | 4125(1) | 26(1) |
| C(8)  | 11402(2) | 4638(1)  | 3781(1) | 27(1) |
| C(9)  | 8495(2)  | 3181(1)  | 3628(1) | 27(1) |
| C(10) | 8142(2)  | 2166(1)  | 1141(1) | 23(1) |
| C(11) | 7915(2)  | 372(1)   | 1144(1) | 24(1) |
| O(50) | 3022(2)  | -1043(2) | 2693(2) | 56(1) |
| C(50) | 4148(2)  | 235(2)   | 3231(2) | 48(1) |

| <b>Table 6:</b> Anisotropic displacement parameters ( $\text{\AA}^2 \cdot 10^3$ ) compound <b>8a</b> •MeOH. |                 |                 |                 |                 |                 |                 |
|-------------------------------------------------------------------------------------------------------------|-----------------|-----------------|-----------------|-----------------|-----------------|-----------------|
| Atom                                                                                                        | U <sup>11</sup> | U <sup>22</sup> | U <sup>33</sup> | U <sup>23</sup> | U <sup>13</sup> | U <sup>12</sup> |
| O(1)                                                                                                        | 26(1)           | 17(1)           | 38(1)           | -1(1)           | -5(1)           | -1(1)           |
| N(1)                                                                                                        | 25(1)           | 16(1)           | 32(1)           | 2(1)            | -6(1)           | 1(1)            |
| C(1)                                                                                                        | 23(1)           | 15(1)           | 26(1)           | 0(1)            | -3(1)           | 1(1)            |
| O(2)                                                                                                        | 39(1)           | 18(1)           | 73(1)           | 4(1)            | -22(1)          | 1(1)            |
| C(2)                                                                                                        | 20(1)           | 20(1)           | 26(1)           | -2(1)           | -1(1)           | 0(1)            |
| C(3)                                                                                                        | 23(1)           | 18(1)           | 22(1)           | 1(1)            | 0(1)            | -2(1)           |
| C(4)                                                                                                        | 28(1)           | 21(1)           | 23(1)           | 3(1)            | -1(1)           | -1(1)           |
| C(5)                                                                                                        | 27(1)           | 32(1)           | 33(1)           | 3(1)            | 4(1)            | 8(1)            |
| C(6)                                                                                                        | 28(1)           | 19(1)           | 23(1)           | -3(1)           | 1(1)            | 2(1)            |
| C(7)                                                                                                        | 32(1)           | 23(1)           | 20(1)           | 1(1)            | -1(1)           | 0(1)            |
| C(8)                                                                                                        | 27(1)           | 23(1)           | 27(1)           | -3(1)           | -8(1)           | 1(1)            |
| C(9)                                                                                                        | 36(1)           | 20(1)           | 24(1)           | 5(1)            | 1(1)            | -3(1)           |
| C(10)                                                                                                       | 24(1)           | 16(1)           | 26(1)           | -1(1)           | -2(1)           | 0(1)            |
| C(11)                                                                                                       | 24(1)           | 15(1)           | 32(1)           | -1(1)           | 1(1)            | 0(1)            |
| O(50)                                                                                                       | 35(1)           | 39(1)           | 88(1)           | -6(1)           | -4(1)           | 5(1)            |
| C(50)                                                                                                       | 34(1)           | 54(1)           | 53(1)           | -11(1)          | 1(1)            | 0(1)            |
